# Supplementary material for: Graph-theoretical model of global human interactome reveals enhanced long-range communicability in cancer networks
Source: PLoS One. 2017 Jan 31;12(1):e0170953. doi: 10.1371/journal.pone.0170953 (PMC5283687; doi:10.1371/journal.pone.0170953)
Supplement: S1 Table — (XLSX) [file pone.0170953.s001.xlsx]

## Sheet: TCGA_BRCA_TUMOR
unc.edu__AgilentG4502A_07_3__TCGA-A1-A0SD-01A-11R-A115-07__gene_expression_analysis.txt
unc.edu__AgilentG4502A_07_3__TCGA-A1-A0SE-01A-11R-A084-07__gene_expression_analysis.txt
unc.edu__AgilentG4502A_07_3__TCGA-A1-A0SH-01A-11R-A084-07__gene_expression_analysis.txt
unc.edu__AgilentG4502A_07_3__TCGA-A1-A0SJ-01A-11R-A084-07__gene_expression_analysis.txt
unc.edu__AgilentG4502A_07_3__TCGA-A1-A0SK-01A-12R-A084-07__gene_expression_analysis.txt
unc.edu__AgilentG4502A_07_3__TCGA-A1-A0SM-01A-11R-A084-07__gene_expression_analysis.txt
unc.edu__AgilentG4502A_07_3__TCGA-A1-A0SO-01A-22R-A084-07__gene_expression_analysis.txt
unc.edu__AgilentG4502A_07_3__TCGA-A1-A0SP-01A-11R-A084-07__gene_expression_analysis.txt
unc.edu__AgilentG4502A_07_3__TCGA-A2-A04N-01A-11R-A115-07__gene_expression_analysis.txt
unc.edu__AgilentG4502A_07_3__TCGA-A2-A04P-01A-31R-A034-07__gene_expression_analysis.txt
unc.edu__AgilentG4502A_07_3__TCGA-A2-A04Q-01A-21R-A034-07__gene_expression_analysis.txt
unc.edu__AgilentG4502A_07_3__TCGA-A2-A04R-01A-41R-A109-07__gene_expression_analysis.txt
unc.edu__AgilentG4502A_07_3__TCGA-A2-A04T-01A-21R-A034-07__gene_expression_analysis.txt
unc.edu__AgilentG4502A_07_3__TCGA-A2-A04U-01A-11R-A115-07__gene_expression_analysis.txt
unc.edu__AgilentG4502A_07_3__TCGA-A2-A04V-01A-21R-A034-07__gene_expression_analysis.txt
unc.edu__AgilentG4502A_07_3__TCGA-A2-A04W-01A-31R-A115-07__gene_expression_analysis.txt
unc.edu__AgilentG4502A_07_3__TCGA-A2-A04X-01A-21R-A034-07__gene_expression_analysis.txt
unc.edu__AgilentG4502A_07_3__TCGA-A2-A04Y-01A-21R-A034-07__gene_expression_analysis.txt
unc.edu__AgilentG4502A_07_3__TCGA-A2-A0CL-01A-11R-A115-07__gene_expression_analysis.txt
unc.edu__AgilentG4502A_07_3__TCGA-A2-A0CM-01A-31R-A034-07__gene_expression_analysis.txt
unc.edu__AgilentG4502A_07_3__TCGA-A2-A0CP-01A-11R-A034-07__gene_expression_analysis.txt
unc.edu__AgilentG4502A_07_3__TCGA-A2-A0CQ-01A-21R-A034-07__gene_expression_analysis.txt
unc.edu__AgilentG4502A_07_3__TCGA-A2-A0CS-01A-11R-A115-07__gene_expression_analysis.txt
unc.edu__AgilentG4502A_07_3__TCGA-A2-A0CT-01A-31R-A056-07__gene_expression_analysis.txt
unc.edu__AgilentG4502A_07_3__TCGA-A2-A0CU-01A-12R-A034-07__gene_expression_analysis.txt
unc.edu__AgilentG4502A_07_3__TCGA-A2-A0CV-01A-31R-A115-07__gene_expression_analysis.txt
unc.edu__AgilentG4502A_07_3__TCGA-A2-A0CW-01A-21R-A115-07__gene_expression_analysis.txt
unc.edu__AgilentG4502A_07_3__TCGA-A2-A0CX-01A-21R-A00Z-07__gene_expression_analysis.txt
unc.edu__AgilentG4502A_07_3__TCGA-A2-A0CY-01A-12R-A034-07__gene_expression_analysis.txt
unc.edu__AgilentG4502A_07_3__TCGA-A2-A0CZ-01A-11R-A034-07__gene_expression_analysis.txt
unc.edu__AgilentG4502A_07_3__TCGA-A2-A0D0-01A-11R-A00Z-07__gene_expression_analysis.txt
unc.edu__AgilentG4502A_07_3__TCGA-A2-A0D1-01A-11R-A034-07__gene_expression_analysis.txt
unc.edu__AgilentG4502A_07_3__TCGA-A2-A0D2-01A-21R-A034-07__gene_expression_analysis.txt
unc.edu__AgilentG4502A_07_3__TCGA-A2-A0D3-01A-11R-A115-07__gene_expression_analysis.txt
unc.edu__AgilentG4502A_07_3__TCGA-A2-A0D4-01A-11R-A00Z-07__gene_expression_analysis.txt
unc.edu__AgilentG4502A_07_3__TCGA-A2-A0EM-01A-11R-A034-07__gene_expression_analysis.txt
unc.edu__AgilentG4502A_07_3__TCGA-A2-A0EN-01A-13R-A084-07__gene_expression_analysis.txt
unc.edu__AgilentG4502A_07_3__TCGA-A2-A0EO-01A-11R-A034-07__gene_expression_analysis.txt
unc.edu__AgilentG4502A_07_3__TCGA-A2-A0EQ-01A-11R-A034-07__gene_expression_analysis.txt
unc.edu__AgilentG4502A_07_3__TCGA-A2-A0ER-01A-21R-A034-07__gene_expression_analysis.txt
unc.edu__AgilentG4502A_07_3__TCGA-A2-A0ES-01A-11R-A115-07__gene_expression_analysis.txt
unc.edu__AgilentG4502A_07_3__TCGA-A2-A0ET-01A-31R-A034-07__gene_expression_analysis.txt
unc.edu__AgilentG4502A_07_3__TCGA-A2-A0EU-01A-22R-A056-07__gene_expression_analysis.txt
unc.edu__AgilentG4502A_07_3__TCGA-A2-A0EV-01A-11R-A034-07__gene_expression_analysis.txt
unc.edu__AgilentG4502A_07_3__TCGA-A2-A0EW-01A-21R-A115-07__gene_expression_analysis.txt
unc.edu__AgilentG4502A_07_3__TCGA-A2-A0EX-01A-21R-A034-07__gene_expression_analysis.txt
unc.edu__AgilentG4502A_07_3__TCGA-A2-A0EY-01A-11R-A034-07__gene_expression_analysis.txt
unc.edu__AgilentG4502A_07_3__TCGA-A2-A0ST-01A-12R-A084-07__gene_expression_analysis.txt
unc.edu__AgilentG4502A_07_3__TCGA-A2-A0SU-01A-11R-A084-07__gene_expression_analysis.txt
unc.edu__AgilentG4502A_07_3__TCGA-A2-A0SV-01A-11R-A084-07__gene_expression_analysis.txt
unc.edu__AgilentG4502A_07_3__TCGA-A2-A0SW-01A-11R-A084-07__gene_expression_analysis.txt
unc.edu__AgilentG4502A_07_3__TCGA-A2-A0SX-01A-12R-A084-07__gene_expression_analysis.txt
unc.edu__AgilentG4502A_07_3__TCGA-A2-A0SY-01A-31R-A084-07__gene_expression_analysis.txt
unc.edu__AgilentG4502A_07_3__TCGA-A2-A0T0-01A-22R-A084-07__gene_expression_analysis.txt
unc.edu__AgilentG4502A_07_3__TCGA-A2-A0T1-01A-21R-A084-07__gene_expression_analysis.txt
unc.edu__AgilentG4502A_07_3__TCGA-A2-A0T2-01A-11R-A084-07__gene_expression_analysis.txt
unc.edu__AgilentG4502A_07_3__TCGA-A2-A0T3-01A-21R-A115-07__gene_expression_analysis.txt
unc.edu__AgilentG4502A_07_3__TCGA-A2-A0T4-01A-31R-A084-07__gene_expression_analysis.txt
unc.edu__AgilentG4502A_07_3__TCGA-A2-A0T5-01A-21R-A084-07__gene_expression_analysis.txt
unc.edu__AgilentG4502A_07_3__TCGA-A2-A0T6-01A-11R-A084-07__gene_expression_analysis.txt
unc.edu__AgilentG4502A_07_3__TCGA-A2-A0T7-01A-21R-A084-07__gene_expression_analysis.txt
unc.edu__AgilentG4502A_07_3__TCGA-A2-A0YC-01A-11R-A109-07__gene_expression_analysis.txt
unc.edu__AgilentG4502A_07_3__TCGA-A2-A0YD-01A-11R-A109-07__gene_expression_analysis.txt
unc.edu__AgilentG4502A_07_3__TCGA-A2-A0YE-01A-11R-A109-07__gene_expression_analysis.txt
unc.edu__AgilentG4502A_07_3__TCGA-A2-A0YF-01A-21R-A109-07__gene_expression_analysis.txt
unc.edu__AgilentG4502A_07_3__TCGA-A2-A0YG-01A-21R-A109-07__gene_expression_analysis.txt
unc.edu__AgilentG4502A_07_3__TCGA-A2-A0YH-01A-11R-A109-07__gene_expression_analysis.txt
unc.edu__AgilentG4502A_07_3__TCGA-A2-A0YI-01A-31R-A10J-07__gene_expression_analysis.txt
unc.edu__AgilentG4502A_07_3__TCGA-A2-A0YJ-01A-11R-A109-07__gene_expression_analysis.txt
unc.edu__AgilentG4502A_07_3__TCGA-A2-A0YK-01A-22R-A109-07__gene_expression_analysis.txt
unc.edu__AgilentG4502A_07_3__TCGA-A2-A0YL-01A-21R-A109-07__gene_expression_analysis.txt
unc.edu__AgilentG4502A_07_3__TCGA-A2-A0YM-01A-11R-A109-07__gene_expression_analysis.txt
unc.edu__AgilentG4502A_07_3__TCGA-A2-A0YT-01A-11R-A109-07__gene_expression_analysis.txt
unc.edu__AgilentG4502A_07_3__TCGA-A7-A0CD-01A-11R-A00Z-07__gene_expression_analysis.txt
unc.edu__AgilentG4502A_07_3__TCGA-A7-A0CE-01A-11R-A00Z-07__gene_expression_analysis.txt
unc.edu__AgilentG4502A_07_3__TCGA-A7-A0CG-01A-12R-A056-07__gene_expression_analysis.txt
unc.edu__AgilentG4502A_07_3__TCGA-A7-A0CH-01A-21R-A00Z-07__gene_expression_analysis.txt
unc.edu__AgilentG4502A_07_3__TCGA-A7-A0CJ-01A-21R-A00Z-07__gene_expression_analysis.txt
unc.edu__AgilentG4502A_07_3__TCGA-A7-A0D9-01A-31R-A056-07__gene_expression_analysis.txt
unc.edu__AgilentG4502A_07_3__TCGA-A7-A0DA-01A-31R-A115-07__gene_expression_analysis.txt
unc.edu__AgilentG4502A_07_3__TCGA-A7-A0DB-01A-11R-A00Z-07__gene_expression_analysis.txt
unc.edu__AgilentG4502A_07_3__TCGA-A7-A0DC-01A-11R-A00Z-07__gene_expression_analysis.txt
unc.edu__AgilentG4502A_07_3__TCGA-A7-A13D-01A-13R-A12P-07__gene_expression_analysis.txt
unc.edu__AgilentG4502A_07_3__TCGA-A7-A13E-01A-11R-A12P-07__gene_expression_analysis.txt
unc.edu__AgilentG4502A_07_3__TCGA-A7-A13F-01A-11R-A12P-07__gene_expression_analysis.txt
unc.edu__AgilentG4502A_07_3__TCGA-A8-A06N-01A-12R-A056-07__gene_expression_analysis.txt
unc.edu__AgilentG4502A_07_3__TCGA-A8-A06O-01A-11R-A00Z-07__gene_expression_analysis.txt
unc.edu__AgilentG4502A_07_3__TCGA-A8-A06P-01A-11R-A00Z-07__gene_expression_analysis.txt
unc.edu__AgilentG4502A_07_3__TCGA-A8-A06Q-01A-11R-A034-07__gene_expression_analysis.txt
unc.edu__AgilentG4502A_07_3__TCGA-A8-A06R-01A-11R-A00Z-07__gene_expression_analysis.txt
unc.edu__AgilentG4502A_07_3__TCGA-A8-A06T-01A-11R-A00Z-07__gene_expression_analysis.txt
unc.edu__AgilentG4502A_07_3__TCGA-A8-A06U-01A-11R-A00Z-07__gene_expression_analysis.txt
unc.edu__AgilentG4502A_07_3__TCGA-A8-A06X-01A-21R-A00Z-07__gene_expression_analysis.txt
unc.edu__AgilentG4502A_07_3__TCGA-A8-A06Y-01A-21R-A00Z-07__gene_expression_analysis.txt
unc.edu__AgilentG4502A_07_3__TCGA-A8-A06Z-01A-11R-A00Z-07__gene_expression_analysis.txt
unc.edu__AgilentG4502A_07_3__TCGA-A8-A075-01A-11R-A084-07__gene_expression_analysis.txt
unc.edu__AgilentG4502A_07_3__TCGA-A8-A076-01A-21R-A00Z-07__gene_expression_analysis.txt
unc.edu__AgilentG4502A_07_3__TCGA-A8-A079-01A-21R-A00Z-07__gene_expression_analysis.txt
unc.edu__AgilentG4502A_07_3__TCGA-A8-A07B-01A-11R-A00Z-07__gene_expression_analysis.txt
unc.edu__AgilentG4502A_07_3__TCGA-A8-A07C-01A-11R-A034-07__gene_expression_analysis.txt
unc.edu__AgilentG4502A_07_3__TCGA-A8-A07E-01A-11R-A034-07__gene_expression_analysis.txt
unc.edu__AgilentG4502A_07_3__TCGA-A8-A07F-01A-11R-A00Z-07__gene_expression_analysis.txt
unc.edu__AgilentG4502A_07_3__TCGA-A8-A07G-01A-11R-A034-07__gene_expression_analysis.txt
unc.edu__AgilentG4502A_07_3__TCGA-A8-A07I-01A-11R-A00Z-07__gene_expression_analysis.txt
unc.edu__AgilentG4502A_07_3__TCGA-A8-A07J-01A-11R-A00Z-07__gene_expression_analysis.txt
unc.edu__AgilentG4502A_07_3__TCGA-A8-A07L-01A-11R-A040-07__gene_expression_analysis.txt
unc.edu__AgilentG4502A_07_3__TCGA-A8-A07O-01A-11R-A00Z-07__gene_expression_analysis.txt
unc.edu__AgilentG4502A_07_3__TCGA-A8-A07P-01A-11R-A00Z-07__gene_expression_analysis.txt
unc.edu__AgilentG4502A_07_3__TCGA-A8-A07R-01A-21R-A034-07__gene_expression_analysis.txt
unc.edu__AgilentG4502A_07_3__TCGA-A8-A07S-01A-11R-A034-07__gene_expression_analysis.txt
unc.edu__AgilentG4502A_07_3__TCGA-A8-A07U-01A-11R-A034-07__gene_expression_analysis.txt
unc.edu__AgilentG4502A_07_3__TCGA-A8-A07W-01A-11R-A00Z-07__gene_expression_analysis.txt
unc.edu__AgilentG4502A_07_3__TCGA-A8-A07Z-01A-11R-A00Z-07__gene_expression_analysis.txt
unc.edu__AgilentG4502A_07_3__TCGA-A8-A081-01A-11R-A00Z-07__gene_expression_analysis.txt
unc.edu__AgilentG4502A_07_3__TCGA-A8-A082-01A-11R-A00Z-07__gene_expression_analysis.txt
unc.edu__AgilentG4502A_07_3__TCGA-A8-A083-01A-21R-A00Z-07__gene_expression_analysis.txt
unc.edu__AgilentG4502A_07_3__TCGA-A8-A084-01A-21R-A00Z-07__gene_expression_analysis.txt
unc.edu__AgilentG4502A_07_3__TCGA-A8-A085-01A-11R-A00Z-07__gene_expression_analysis.txt
unc.edu__AgilentG4502A_07_3__TCGA-A8-A086-01A-11R-A00Z-07__gene_expression_analysis.txt
unc.edu__AgilentG4502A_07_3__TCGA-A8-A08A-01A-11R-A00Z-07__gene_expression_analysis.txt
unc.edu__AgilentG4502A_07_3__TCGA-A8-A08B-01A-11R-A00Z-07__gene_expression_analysis.txt
unc.edu__AgilentG4502A_07_3__TCGA-A8-A08C-01A-11R-A00Z-07__gene_expression_analysis.txt
unc.edu__AgilentG4502A_07_3__TCGA-A8-A08F-01A-11R-A00Z-07__gene_expression_analysis.txt
unc.edu__AgilentG4502A_07_3__TCGA-A8-A08G-01A-11R-A00Z-07__gene_expression_analysis.txt
unc.edu__AgilentG4502A_07_3__TCGA-A8-A08H-01A-21R-A00Z-07__gene_expression_analysis.txt
unc.edu__AgilentG4502A_07_3__TCGA-A8-A08I-01A-11R-A00Z-07__gene_expression_analysis.txt
unc.edu__AgilentG4502A_07_3__TCGA-A8-A08J-01A-11R-A00Z-07__gene_expression_analysis.txt
unc.edu__AgilentG4502A_07_3__TCGA-A8-A08L-01A-11R-A00Z-07__gene_expression_analysis.txt
unc.edu__AgilentG4502A_07_3__TCGA-A8-A08O-01A-21R-A056-07__gene_expression_analysis.txt
unc.edu__AgilentG4502A_07_3__TCGA-A8-A08P-01A-11R-A00Z-07__gene_expression_analysis.txt
unc.edu__AgilentG4502A_07_3__TCGA-A8-A08R-01A-11R-A034-07__gene_expression_analysis.txt
unc.edu__AgilentG4502A_07_3__TCGA-A8-A08S-01A-11R-A034-07__gene_expression_analysis.txt
unc.edu__AgilentG4502A_07_3__TCGA-A8-A08T-01A-21R-A00Z-07__gene_expression_analysis.txt
unc.edu__AgilentG4502A_07_3__TCGA-A8-A08X-01A-21R-A00Z-07__gene_expression_analysis.txt
unc.edu__AgilentG4502A_07_3__TCGA-A8-A08Z-01A-21R-A00Z-07__gene_expression_analysis.txt
unc.edu__AgilentG4502A_07_3__TCGA-A8-A090-01A-11R-A00Z-07__gene_expression_analysis.txt
unc.edu__AgilentG4502A_07_3__TCGA-A8-A091-01A-11R-A00Z-07__gene_expression_analysis.txt
unc.edu__AgilentG4502A_07_3__TCGA-A8-A092-01A-11R-A00Z-07__gene_expression_analysis.txt
unc.edu__AgilentG4502A_07_3__TCGA-A8-A093-01A-11R-A00Z-07__gene_expression_analysis.txt
unc.edu__AgilentG4502A_07_3__TCGA-A8-A094-01A-11R-A00Z-07__gene_expression_analysis.txt
unc.edu__AgilentG4502A_07_3__TCGA-A8-A095-01A-11R-A00Z-07__gene_expression_analysis.txt
unc.edu__AgilentG4502A_07_3__TCGA-A8-A096-01A-11R-A00Z-07__gene_expression_analysis.txt
unc.edu__AgilentG4502A_07_3__TCGA-A8-A097-01A-11R-A034-07__gene_expression_analysis.txt
unc.edu__AgilentG4502A_07_3__TCGA-A8-A099-01A-11R-A00Z-07__gene_expression_analysis.txt
unc.edu__AgilentG4502A_07_3__TCGA-A8-A09A-01A-11R-A00Z-07__gene_expression_analysis.txt
unc.edu__AgilentG4502A_07_3__TCGA-A8-A09B-01A-11R-A00Z-07__gene_expression_analysis.txt
unc.edu__AgilentG4502A_07_3__TCGA-A8-A09C-01A-11R-A00Z-07__gene_expression_analysis.txt
unc.edu__AgilentG4502A_07_3__TCGA-A8-A09D-01A-11R-A00Z-07__gene_expression_analysis.txt
unc.edu__AgilentG4502A_07_3__TCGA-A8-A09E-01A-11R-A00Z-07__gene_expression_analysis.txt
unc.edu__AgilentG4502A_07_3__TCGA-A8-A09G-01A-21R-A00Z-07__gene_expression_analysis.txt
unc.edu__AgilentG4502A_07_3__TCGA-A8-A09I-01A-22R-A034-07__gene_expression_analysis.txt
unc.edu__AgilentG4502A_07_3__TCGA-A8-A09K-01A-11R-A00Z-07__gene_expression_analysis.txt
unc.edu__AgilentG4502A_07_3__TCGA-A8-A09M-01A-11R-A00Z-07__gene_expression_analysis.txt
unc.edu__AgilentG4502A_07_3__TCGA-A8-A09N-01A-11R-A00Z-07__gene_expression_analysis.txt
unc.edu__AgilentG4502A_07_3__TCGA-A8-A09Q-01A-11R-A00Z-07__gene_expression_analysis.txt
unc.edu__AgilentG4502A_07_3__TCGA-A8-A09R-01A-11R-A00Z-07__gene_expression_analysis.txt
unc.edu__AgilentG4502A_07_3__TCGA-A8-A09T-01A-11R-A00Z-07__gene_expression_analysis.txt
unc.edu__AgilentG4502A_07_3__TCGA-A8-A09V-01A-11R-A034-07__gene_expression_analysis.txt
unc.edu__AgilentG4502A_07_3__TCGA-A8-A09W-01A-11R-A00Z-07__gene_expression_analysis.txt
unc.edu__AgilentG4502A_07_3__TCGA-A8-A09X-01A-11R-A00Z-07__gene_expression_analysis.txt
unc.edu__AgilentG4502A_07_3__TCGA-A8-A09Z-01A-11R-A00Z-07__gene_expression_analysis.txt
unc.edu__AgilentG4502A_07_3__TCGA-A8-A0A1-01A-11R-A00Z-07__gene_expression_analysis.txt
unc.edu__AgilentG4502A_07_3__TCGA-A8-A0A2-01A-11R-A034-07__gene_expression_analysis.txt
unc.edu__AgilentG4502A_07_3__TCGA-A8-A0A4-01A-11R-A00Z-07__gene_expression_analysis.txt
unc.edu__AgilentG4502A_07_3__TCGA-A8-A0A6-01A-12R-A056-07__gene_expression_analysis.txt
unc.edu__AgilentG4502A_07_3__TCGA-A8-A0A7-01A-11R-A040-07__gene_expression_analysis.txt
unc.edu__AgilentG4502A_07_3__TCGA-A8-A0A9-01A-11R-A00Z-07__gene_expression_analysis.txt
unc.edu__AgilentG4502A_07_3__TCGA-A8-A0AB-01A-11R-A034-07__gene_expression_analysis.txt
unc.edu__AgilentG4502A_07_3__TCGA-A8-A0AD-01A-11R-A056-07__gene_expression_analysis.txt
unc.edu__AgilentG4502A_07_3__TCGA-AN-A03X-01A-21R-A00Z-07__gene_expression_analysis.txt
unc.edu__AgilentG4502A_07_3__TCGA-AN-A03Y-01A-21R-A00Z-07__gene_expression_analysis.txt
unc.edu__AgilentG4502A_07_3__TCGA-AN-A041-01A-11R-A034-07__gene_expression_analysis.txt
unc.edu__AgilentG4502A_07_3__TCGA-AN-A046-01A-21R-A034-07__gene_expression_analysis.txt
unc.edu__AgilentG4502A_07_3__TCGA-AN-A049-01A-21R-A00Z-07__gene_expression_analysis.txt
unc.edu__AgilentG4502A_07_3__TCGA-AN-A04A-01A-21R-A034-07__gene_expression_analysis.txt
unc.edu__AgilentG4502A_07_3__TCGA-AN-A04C-01A-21R-A034-07__gene_expression_analysis.txt
unc.edu__AgilentG4502A_07_3__TCGA-AN-A04D-01A-21R-A034-07__gene_expression_analysis.txt
unc.edu__AgilentG4502A_07_3__TCGA-AN-A0AJ-01A-11R-A00Z-07__gene_expression_analysis.txt
unc.edu__AgilentG4502A_07_3__TCGA-AN-A0AK-01A-21R-A00Z-07__gene_expression_analysis.txt
unc.edu__AgilentG4502A_07_3__TCGA-AN-A0AL-01A-11R-A00Z-07__gene_expression_analysis.txt
unc.edu__AgilentG4502A_07_3__TCGA-AN-A0AM-01A-11R-A034-07__gene_expression_analysis.txt
unc.edu__AgilentG4502A_07_3__TCGA-AN-A0AR-01A-11R-A00Z-07__gene_expression_analysis.txt
unc.edu__AgilentG4502A_07_3__TCGA-AN-A0AS-01A-11R-A00Z-07__gene_expression_analysis.txt
unc.edu__AgilentG4502A_07_3__TCGA-AN-A0AT-01A-11R-A034-07__gene_expression_analysis.txt
unc.edu__AgilentG4502A_07_3__TCGA-AN-A0FD-01A-11R-A034-07__gene_expression_analysis.txt
unc.edu__AgilentG4502A_07_3__TCGA-AN-A0FE-01A-11R-A00Z-07__gene_expression_analysis.txt
unc.edu__AgilentG4502A_07_3__TCGA-AN-A0FF-01A-11R-A034-07__gene_expression_analysis.txt
unc.edu__AgilentG4502A_07_3__TCGA-AN-A0FG-01A-11R-A00Z-07__gene_expression_analysis.txt
unc.edu__AgilentG4502A_07_3__TCGA-AN-A0FJ-01A-11R-A00Z-07__gene_expression_analysis.txt
unc.edu__AgilentG4502A_07_3__TCGA-AN-A0FK-01A-11R-A034-07__gene_expression_analysis.txt
unc.edu__AgilentG4502A_07_3__TCGA-AN-A0FL-01A-11R-A034-07__gene_expression_analysis.txt
unc.edu__AgilentG4502A_07_3__TCGA-AN-A0FN-01A-11R-A034-07__gene_expression_analysis.txt
unc.edu__AgilentG4502A_07_3__TCGA-AN-A0FS-01A-11R-A034-07__gene_expression_analysis.txt
unc.edu__AgilentG4502A_07_3__TCGA-AN-A0FT-01A-11R-A034-07__gene_expression_analysis.txt
unc.edu__AgilentG4502A_07_3__TCGA-AN-A0FV-01A-11R-A00Z-07__gene_expression_analysis.txt
unc.edu__AgilentG4502A_07_3__TCGA-AN-A0FW-01A-11R-A034-07__gene_expression_analysis.txt
unc.edu__AgilentG4502A_07_3__TCGA-AN-A0FX-01A-11R-A034-07__gene_expression_analysis.txt
unc.edu__AgilentG4502A_07_3__TCGA-AN-A0FY-01A-11R-A034-07__gene_expression_analysis.txt
unc.edu__AgilentG4502A_07_3__TCGA-AN-A0FZ-01A-11R-A034-07__gene_expression_analysis.txt
unc.edu__AgilentG4502A_07_3__TCGA-AN-A0G0-01A-11R-A034-07__gene_expression_analysis.txt
unc.edu__AgilentG4502A_07_3__TCGA-AN-A0XL-01A-11R-A10J-07__gene_expression_analysis.txt
unc.edu__AgilentG4502A_07_3__TCGA-AN-A0XN-01A-21R-A109-07__gene_expression_analysis.txt
unc.edu__AgilentG4502A_07_3__TCGA-AN-A0XO-01A-11R-A109-07__gene_expression_analysis.txt
unc.edu__AgilentG4502A_07_3__TCGA-AN-A0XP-01A-11R-A109-07__gene_expression_analysis.txt
unc.edu__AgilentG4502A_07_3__TCGA-AN-A0XR-01A-11R-A109-07__gene_expression_analysis.txt
unc.edu__AgilentG4502A_07_3__TCGA-AN-A0XS-01A-22R-A109-07__gene_expression_analysis.txt
unc.edu__AgilentG4502A_07_3__TCGA-AN-A0XT-01A-11R-A109-07__gene_expression_analysis.txt
unc.edu__AgilentG4502A_07_3__TCGA-AN-A0XU-01A-11R-A109-07__gene_expression_analysis.txt
unc.edu__AgilentG4502A_07_3__TCGA-AN-A0XV-01A-11R-A109-07__gene_expression_analysis.txt
unc.edu__AgilentG4502A_07_3__TCGA-AN-A0XW-01A-11R-A109-07__gene_expression_analysis.txt
unc.edu__AgilentG4502A_07_3__TCGA-AO-A03L-01A-41R-A056-07__gene_expression_analysis.txt
unc.edu__AgilentG4502A_07_3__TCGA-AO-A03M-01B-11R-A10J-07__gene_expression_analysis.txt
unc.edu__AgilentG4502A_07_3__TCGA-AO-A03N-01B-11R-A10J-07__gene_expression_analysis.txt
unc.edu__AgilentG4502A_07_3__TCGA-AO-A03O-01A-11R-A00Z-07__gene_expression_analysis.txt
unc.edu__AgilentG4502A_07_3__TCGA-AO-A03P-01A-11R-A00Z-07__gene_expression_analysis.txt
unc.edu__AgilentG4502A_07_3__TCGA-AO-A03R-01A-21R-A034-07__gene_expression_analysis.txt
unc.edu__AgilentG4502A_07_3__TCGA-AO-A03T-01A-21R-A034-07__gene_expression_analysis.txt
unc.edu__AgilentG4502A_07_3__TCGA-AO-A03U-01B-21R-A10J-07__gene_expression_analysis.txt
unc.edu__AgilentG4502A_07_3__TCGA-AO-A03V-01A-11R-A115-07__gene_expression_analysis.txt
unc.edu__AgilentG4502A_07_3__TCGA-AO-A0J2-01A-11R-A034-07__gene_expression_analysis.txt
unc.edu__AgilentG4502A_07_3__TCGA-AO-A0J3-01A-11R-A034-07__gene_expression_analysis.txt
unc.edu__AgilentG4502A_07_3__TCGA-AO-A0J4-01A-11R-A034-07__gene_expression_analysis.txt
unc.edu__AgilentG4502A_07_3__TCGA-AO-A0J5-01A-11R-A034-07__gene_expression_analysis.txt
unc.edu__AgilentG4502A_07_3__TCGA-AO-A0J6-01A-11R-A034-07__gene_expression_analysis.txt
unc.edu__AgilentG4502A_07_3__TCGA-AO-A0J7-01A-11R-A034-07__gene_expression_analysis.txt
unc.edu__AgilentG4502A_07_3__TCGA-AO-A0J8-01A-21R-A034-07__gene_expression_analysis.txt
unc.edu__AgilentG4502A_07_3__TCGA-AO-A0J9-01A-11R-A034-07__gene_expression_analysis.txt
unc.edu__AgilentG4502A_07_3__TCGA-AO-A0JA-01A-11R-A056-07__gene_expression_analysis.txt
unc.edu__AgilentG4502A_07_3__TCGA-AO-A0JB-01A-11R-A056-07__gene_expression_analysis.txt
unc.edu__AgilentG4502A_07_3__TCGA-AO-A0JC-01A-11R-A056-07__gene_expression_analysis.txt
unc.edu__AgilentG4502A_07_3__TCGA-AO-A0JD-01A-11R-A056-07__gene_expression_analysis.txt
unc.edu__AgilentG4502A_07_3__TCGA-AO-A0JE-01A-11R-A056-07__gene_expression_analysis.txt
unc.edu__AgilentG4502A_07_3__TCGA-AO-A0JF-01A-11R-A056-07__gene_expression_analysis.txt
unc.edu__AgilentG4502A_07_3__TCGA-AO-A0JG-01A-31R-A084-07__gene_expression_analysis.txt
unc.edu__AgilentG4502A_07_3__TCGA-AO-A0JI-01A-21R-A056-07__gene_expression_analysis.txt
unc.edu__AgilentG4502A_07_3__TCGA-AO-A0JJ-01A-11R-A056-07__gene_expression_analysis.txt
unc.edu__AgilentG4502A_07_3__TCGA-AO-A0JL-01A-11R-A056-07__gene_expression_analysis.txt
unc.edu__AgilentG4502A_07_3__TCGA-AO-A0JM-01A-21R-A056-07__gene_expression_analysis.txt
unc.edu__AgilentG4502A_07_3__TCGA-AO-A124-01A-11R-A10J-07__gene_expression_analysis.txt
unc.edu__AgilentG4502A_07_3__TCGA-AO-A125-01A-11R-A10J-07__gene_expression_analysis.txt
unc.edu__AgilentG4502A_07_3__TCGA-AO-A126-01A-11R-A10J-07__gene_expression_analysis.txt
unc.edu__AgilentG4502A_07_3__TCGA-AO-A128-01A-11R-A10J-07__gene_expression_analysis.txt
unc.edu__AgilentG4502A_07_3__TCGA-AO-A129-01A-21R-A10J-07__gene_expression_analysis.txt
unc.edu__AgilentG4502A_07_3__TCGA-AO-A12A-01A-21R-A115-07__gene_expression_analysis.txt
unc.edu__AgilentG4502A_07_3__TCGA-AO-A12B-01A-11R-A10J-07__gene_expression_analysis.txt
unc.edu__AgilentG4502A_07_3__TCGA-AO-A12C-01A-11R-A10J-07__gene_expression_analysis.txt
unc.edu__AgilentG4502A_07_3__TCGA-AO-A12D-01A-11R-A115-07__gene_expression_analysis.txt
unc.edu__AgilentG4502A_07_3__TCGA-AO-A12E-01A-11R-A10J-07__gene_expression_analysis.txt
unc.edu__AgilentG4502A_07_3__TCGA-AO-A12F-01A-11R-A115-07__gene_expression_analysis.txt
unc.edu__AgilentG4502A_07_3__TCGA-AO-A12G-01A-11R-A10J-07__gene_expression_analysis.txt
unc.edu__AgilentG4502A_07_3__TCGA-AO-A12H-01A-11R-A115-07__gene_expression_analysis.txt
unc.edu__AgilentG4502A_07_3__TCGA-AQ-A04H-01B-11R-A10J-07__gene_expression_analysis.txt
unc.edu__AgilentG4502A_07_3__TCGA-AQ-A04J-01A-02R-A034-07__gene_expression_analysis.txt
unc.edu__AgilentG4502A_07_3__TCGA-AQ-A04L-01B-21R-A10J-07__gene_expression_analysis.txt
unc.edu__AgilentG4502A_07_3__TCGA-AR-A0TP-01A-11R-A084-07__gene_expression_analysis.txt
unc.edu__AgilentG4502A_07_3__TCGA-AR-A0TQ-01A-11R-A084-07__gene_expression_analysis.txt
unc.edu__AgilentG4502A_07_3__TCGA-AR-A0TR-01A-11R-A084-07__gene_expression_analysis.txt
unc.edu__AgilentG4502A_07_3__TCGA-AR-A0TS-01A-11R-A115-07__gene_expression_analysis.txt
unc.edu__AgilentG4502A_07_3__TCGA-AR-A0TT-01A-31R-A084-07__gene_expression_analysis.txt
unc.edu__AgilentG4502A_07_3__TCGA-AR-A0TU-01A-31R-A109-07__gene_expression_analysis.txt
unc.edu__AgilentG4502A_07_3__TCGA-AR-A0TV-01A-21R-A084-07__gene_expression_analysis.txt
unc.edu__AgilentG4502A_07_3__TCGA-AR-A0TW-01A-11R-A084-07__gene_expression_analysis.txt
unc.edu__AgilentG4502A_07_3__TCGA-AR-A0TX-01A-11R-A084-07__gene_expression_analysis.txt
unc.edu__AgilentG4502A_07_3__TCGA-AR-A0TY-01A-12R-A115-07__gene_expression_analysis.txt
unc.edu__AgilentG4502A_07_3__TCGA-AR-A0TZ-01A-12R-A084-07__gene_expression_analysis.txt
unc.edu__AgilentG4502A_07_3__TCGA-AR-A0U0-01A-11R-A109-07__gene_expression_analysis.txt
unc.edu__AgilentG4502A_07_3__TCGA-AR-A0U1-01A-11R-A115-07__gene_expression_analysis.txt
unc.edu__AgilentG4502A_07_3__TCGA-AR-A0U2-01A-11R-A109-07__gene_expression_analysis.txt
unc.edu__AgilentG4502A_07_3__TCGA-AR-A0U3-01A-11R-A109-07__gene_expression_analysis.txt
unc.edu__AgilentG4502A_07_3__TCGA-AR-A0U4-01A-11R-A109-07__gene_expression_analysis.txt
unc.edu__AgilentG4502A_07_3__TCGA-AR-A1AH-01A-11R-A12D-07__gene_expression_analysis.txt
unc.edu__AgilentG4502A_07_3__TCGA-AR-A1AI-01A-11R-A12P-07__gene_expression_analysis.txt
unc.edu__AgilentG4502A_07_3__TCGA-AR-A1AJ-01A-21R-A12P-07__gene_expression_analysis.txt
unc.edu__AgilentG4502A_07_3__TCGA-AR-A1AK-01A-21R-A12P-07__gene_expression_analysis.txt
unc.edu__AgilentG4502A_07_3__TCGA-AR-A1AL-01A-21R-A12P-07__gene_expression_analysis.txt
unc.edu__AgilentG4502A_07_3__TCGA-AR-A1AN-01A-11R-A12P-07__gene_expression_analysis.txt
unc.edu__AgilentG4502A_07_3__TCGA-AR-A1AO-01A-11R-A12P-07__gene_expression_analysis.txt
unc.edu__AgilentG4502A_07_3__TCGA-AR-A1AP-01A-11R-A12P-07__gene_expression_analysis.txt
unc.edu__AgilentG4502A_07_3__TCGA-AR-A1AQ-01A-11R-A12P-07__gene_expression_analysis.txt
unc.edu__AgilentG4502A_07_3__TCGA-AR-A1AR-01A-31R-A137-07__gene_expression_analysis.txt
unc.edu__AgilentG4502A_07_3__TCGA-AR-A1AS-01A-11R-A12P-07__gene_expression_analysis.txt
unc.edu__AgilentG4502A_07_3__TCGA-AR-A1AT-01A-11R-A12P-07__gene_expression_analysis.txt
unc.edu__AgilentG4502A_07_3__TCGA-AR-A1AU-01A-11R-A12P-07__gene_expression_analysis.txt
unc.edu__AgilentG4502A_07_3__TCGA-AR-A1AV-01A-21R-A12P-07__gene_expression_analysis.txt
unc.edu__AgilentG4502A_07_3__TCGA-AR-A1AW-01A-21R-A12P-07__gene_expression_analysis.txt
unc.edu__AgilentG4502A_07_3__TCGA-AR-A1AX-01A-11R-A12P-07__gene_expression_analysis.txt
unc.edu__AgilentG4502A_07_3__TCGA-AR-A1AY-01A-21R-A12P-07__gene_expression_analysis.txt
unc.edu__AgilentG4502A_07_3__TCGA-B6-A0I2-01A-11R-A034-07__gene_expression_analysis.txt
unc.edu__AgilentG4502A_07_3__TCGA-B6-A0I5-01A-11R-A034-07__gene_expression_analysis.txt
unc.edu__AgilentG4502A_07_3__TCGA-B6-A0I6-01A-11R-A034-07__gene_expression_analysis.txt
unc.edu__AgilentG4502A_07_3__TCGA-B6-A0I8-01A-11R-A034-07__gene_expression_analysis.txt
unc.edu__AgilentG4502A_07_3__TCGA-B6-A0I9-01A-11R-A034-07__gene_expression_analysis.txt
unc.edu__AgilentG4502A_07_3__TCGA-B6-A0IA-01A-11R-A034-07__gene_expression_analysis.txt
unc.edu__AgilentG4502A_07_3__TCGA-B6-A0IB-01A-11R-A034-07__gene_expression_analysis.txt
unc.edu__AgilentG4502A_07_3__TCGA-B6-A0IC-01A-11R-A034-07__gene_expression_analysis.txt
unc.edu__AgilentG4502A_07_3__TCGA-B6-A0IE-01A-11R-A034-07__gene_expression_analysis.txt
unc.edu__AgilentG4502A_07_3__TCGA-B6-A0IG-01A-11R-A034-07__gene_expression_analysis.txt
unc.edu__AgilentG4502A_07_3__TCGA-B6-A0IH-01A-11R-A115-07__gene_expression_analysis.txt
unc.edu__AgilentG4502A_07_3__TCGA-B6-A0IJ-01A-11R-A034-07__gene_expression_analysis.txt
unc.edu__AgilentG4502A_07_3__TCGA-B6-A0IK-01A-12R-A056-07__gene_expression_analysis.txt
unc.edu__AgilentG4502A_07_3__TCGA-B6-A0IM-01A-11R-A034-07__gene_expression_analysis.txt
unc.edu__AgilentG4502A_07_3__TCGA-B6-A0IN-01A-11R-A034-07__gene_expression_analysis.txt
unc.edu__AgilentG4502A_07_3__TCGA-B6-A0IO-01A-11R-A034-07__gene_expression_analysis.txt
unc.edu__AgilentG4502A_07_3__TCGA-B6-A0IP-01A-11R-A034-07__gene_expression_analysis.txt
unc.edu__AgilentG4502A_07_3__TCGA-B6-A0IQ-01A-11R-A034-07__gene_expression_analysis.txt
unc.edu__AgilentG4502A_07_3__TCGA-B6-A0RE-01A-11R-A056-07__gene_expression_analysis.txt
unc.edu__AgilentG4502A_07_3__TCGA-B6-A0RG-01A-11R-A056-07__gene_expression_analysis.txt
unc.edu__AgilentG4502A_07_3__TCGA-B6-A0RH-01A-21R-A115-07__gene_expression_analysis.txt
unc.edu__AgilentG4502A_07_3__TCGA-B6-A0RI-01A-11R-A056-07__gene_expression_analysis.txt
unc.edu__AgilentG4502A_07_3__TCGA-B6-A0RL-01A-11R-A084-07__gene_expression_analysis.txt
unc.edu__AgilentG4502A_07_3__TCGA-B6-A0RM-01A-11R-A084-07__gene_expression_analysis.txt
unc.edu__AgilentG4502A_07_3__TCGA-B6-A0RN-01A-12R-A084-07__gene_expression_analysis.txt
unc.edu__AgilentG4502A_07_3__TCGA-B6-A0RO-01A-22R-A084-07__gene_expression_analysis.txt
unc.edu__AgilentG4502A_07_3__TCGA-B6-A0RP-01A-21R-A084-07__gene_expression_analysis.txt
unc.edu__AgilentG4502A_07_3__TCGA-B6-A0RQ-01A-11R-A115-07__gene_expression_analysis.txt
unc.edu__AgilentG4502A_07_3__TCGA-B6-A0RS-01A-11R-A084-07__gene_expression_analysis.txt
unc.edu__AgilentG4502A_07_3__TCGA-B6-A0RT-01A-21R-A084-07__gene_expression_analysis.txt
unc.edu__AgilentG4502A_07_3__TCGA-B6-A0RU-01A-11R-A084-07__gene_expression_analysis.txt
unc.edu__AgilentG4502A_07_3__TCGA-B6-A0RV-01A-11R-A084-07__gene_expression_analysis.txt
unc.edu__AgilentG4502A_07_3__TCGA-B6-A0WS-01A-11R-A115-07__gene_expression_analysis.txt
unc.edu__AgilentG4502A_07_3__TCGA-B6-A0WT-01A-11R-A109-07__gene_expression_analysis.txt
unc.edu__AgilentG4502A_07_3__TCGA-B6-A0WV-01A-11R-A109-07__gene_expression_analysis.txt
unc.edu__AgilentG4502A_07_3__TCGA-B6-A0WW-01A-11R-A109-07__gene_expression_analysis.txt
unc.edu__AgilentG4502A_07_3__TCGA-B6-A0WX-01A-11R-A109-07__gene_expression_analysis.txt
unc.edu__AgilentG4502A_07_3__TCGA-B6-A0WY-01A-11R-A109-07__gene_expression_analysis.txt
unc.edu__AgilentG4502A_07_3__TCGA-B6-A0WZ-01A-11R-A109-07__gene_expression_analysis.txt
unc.edu__AgilentG4502A_07_3__TCGA-B6-A0X0-01A-21R-A115-07__gene_expression_analysis.txt
unc.edu__AgilentG4502A_07_3__TCGA-B6-A0X1-01A-11R-A109-07__gene_expression_analysis.txt
unc.edu__AgilentG4502A_07_3__TCGA-B6-A0X4-01A-11R-A109-07__gene_expression_analysis.txt
unc.edu__AgilentG4502A_07_3__TCGA-B6-A0X5-01A-21R-A109-07__gene_expression_analysis.txt
unc.edu__AgilentG4502A_07_3__TCGA-B6-A0X7-01A-11R-A10J-07__gene_expression_analysis.txt
unc.edu__AgilentG4502A_07_3__TCGA-BH-A0AU-01A-11R-A12P-07__gene_expression_analysis.txt
unc.edu__AgilentG4502A_07_3__TCGA-BH-A0AV-01A-31R-A115-07__gene_expression_analysis.txt
unc.edu__AgilentG4502A_07_3__TCGA-BH-A0AW-01A-11R-A056-07__gene_expression_analysis.txt
unc.edu__AgilentG4502A_07_3__TCGA-BH-A0AY-01A-21R-A00Z-07__gene_expression_analysis.txt
unc.edu__AgilentG4502A_07_3__TCGA-BH-A0AZ-01A-21R-A12P-07__gene_expression_analysis.txt
unc.edu__AgilentG4502A_07_3__TCGA-BH-A0B0-01A-21R-A115-07__gene_expression_analysis.txt
unc.edu__AgilentG4502A_07_3__TCGA-BH-A0B1-01A-12R-A056-07__gene_expression_analysis.txt
unc.edu__AgilentG4502A_07_3__TCGA-BH-A0B3-01A-11R-A056-07__gene_expression_analysis.txt
unc.edu__AgilentG4502A_07_3__TCGA-BH-A0B3-11B-21R-A089-07__gene_expression_analysis.txt
unc.edu__AgilentG4502A_07_3__TCGA-BH-A0B4-01A-11R-A00Z-07__gene_expression_analysis.txt
unc.edu__AgilentG4502A_07_3__TCGA-BH-A0B5-01A-11R-A12P-07__gene_expression_analysis.txt
unc.edu__AgilentG4502A_07_3__TCGA-BH-A0B7-01A-12R-A115-07__gene_expression_analysis.txt
unc.edu__AgilentG4502A_07_3__TCGA-BH-A0B8-01A-21R-A056-07__gene_expression_analysis.txt
unc.edu__AgilentG4502A_07_3__TCGA-BH-A0B9-01A-11R-A056-07__gene_expression_analysis.txt
unc.edu__AgilentG4502A_07_3__TCGA-BH-A0BA-01A-11R-A056-07__gene_expression_analysis.txt
unc.edu__AgilentG4502A_07_3__TCGA-BH-A0BC-01A-22R-A084-07__gene_expression_analysis.txt
unc.edu__AgilentG4502A_07_3__TCGA-BH-A0BD-01A-11R-A034-07__gene_expression_analysis.txt
unc.edu__AgilentG4502A_07_3__TCGA-BH-A0BF-01A-21R-A12P-07__gene_expression_analysis.txt
unc.edu__AgilentG4502A_07_3__TCGA-BH-A0BG-01A-11R-A115-07__gene_expression_analysis.txt
unc.edu__AgilentG4502A_07_3__TCGA-BH-A0BJ-01A-11R-A056-07__gene_expression_analysis.txt
unc.edu__AgilentG4502A_07_3__TCGA-BH-A0BL-01A-11R-A115-07__gene_expression_analysis.txt
unc.edu__AgilentG4502A_07_3__TCGA-BH-A0BM-01A-11R-A056-07__gene_expression_analysis.txt
unc.edu__AgilentG4502A_07_3__TCGA-BH-A0BO-01A-23R-A12D-07__gene_expression_analysis.txt
unc.edu__AgilentG4502A_07_3__TCGA-BH-A0BP-01A-11R-A115-07__gene_expression_analysis.txt
unc.edu__AgilentG4502A_07_3__TCGA-BH-A0BQ-01A-21R-A115-07__gene_expression_analysis.txt
unc.edu__AgilentG4502A_07_3__TCGA-BH-A0BR-01A-21R-A115-07__gene_expression_analysis.txt
unc.edu__AgilentG4502A_07_3__TCGA-BH-A0BS-01A-11R-A12P-07__gene_expression_analysis.txt
unc.edu__AgilentG4502A_07_3__TCGA-BH-A0BT-01A-11R-A12P-07__gene_expression_analysis.txt
unc.edu__AgilentG4502A_07_3__TCGA-BH-A0BV-01A-11R-A00Z-07__gene_expression_analysis.txt
unc.edu__AgilentG4502A_07_3__TCGA-BH-A0BW-01A-11R-A115-07__gene_expression_analysis.txt
unc.edu__AgilentG4502A_07_3__TCGA-BH-A0BZ-01A-31R-A12P-07__gene_expression_analysis.txt
unc.edu__AgilentG4502A_07_3__TCGA-BH-A0C0-01A-21R-A056-07__gene_expression_analysis.txt
unc.edu__AgilentG4502A_07_3__TCGA-BH-A0C1-01B-11R-A12D-07__gene_expression_analysis.txt
unc.edu__AgilentG4502A_07_3__TCGA-BH-A0C3-01A-21R-A12P-07__gene_expression_analysis.txt
unc.edu__AgilentG4502A_07_3__TCGA-BH-A0C7-01B-11R-A115-07__gene_expression_analysis.txt
unc.edu__AgilentG4502A_07_3__TCGA-BH-A0DD-01A-31R-A12P-07__gene_expression_analysis.txt
unc.edu__AgilentG4502A_07_3__TCGA-BH-A0DE-01A-11R-A115-07__gene_expression_analysis.txt
unc.edu__AgilentG4502A_07_3__TCGA-BH-A0DG-01A-21R-A12P-07__gene_expression_analysis.txt
unc.edu__AgilentG4502A_07_3__TCGA-BH-A0DH-01A-11R-A084-07__gene_expression_analysis.txt
unc.edu__AgilentG4502A_07_3__TCGA-BH-A0DI-01A-21R-A12P-07__gene_expression_analysis.txt
unc.edu__AgilentG4502A_07_3__TCGA-BH-A0DK-01A-21R-A056-07__gene_expression_analysis.txt
unc.edu__AgilentG4502A_07_3__TCGA-BH-A0DL-01A-11R-A115-07__gene_expression_analysis.txt
unc.edu__AgilentG4502A_07_3__TCGA-BH-A0DO-01B-11R-A12D-07__gene_expression_analysis.txt
unc.edu__AgilentG4502A_07_3__TCGA-BH-A0DP-01A-21R-A056-07__gene_expression_analysis.txt
unc.edu__AgilentG4502A_07_3__TCGA-BH-A0DQ-01A-11R-A084-07__gene_expression_analysis.txt
unc.edu__AgilentG4502A_07_3__TCGA-BH-A0DS-01A-11R-A056-07__gene_expression_analysis.txt
unc.edu__AgilentG4502A_07_3__TCGA-BH-A0DT-01A-21R-A12D-07__gene_expression_analysis.txt
unc.edu__AgilentG4502A_07_3__TCGA-BH-A0DX-01A-11R-A115-07__gene_expression_analysis.txt
unc.edu__AgilentG4502A_07_3__TCGA-BH-A0DZ-01A-11R-A00Z-07__gene_expression_analysis.txt
unc.edu__AgilentG4502A_07_3__TCGA-BH-A0E0-01A-11R-A056-07__gene_expression_analysis.txt
unc.edu__AgilentG4502A_07_3__TCGA-BH-A0E1-01A-11R-A056-07__gene_expression_analysis.txt
unc.edu__AgilentG4502A_07_3__TCGA-BH-A0E2-01A-11R-A056-07__gene_expression_analysis.txt
unc.edu__AgilentG4502A_07_3__TCGA-BH-A0E6-01A-11R-A034-07__gene_expression_analysis.txt
unc.edu__AgilentG4502A_07_3__TCGA-BH-A0E7-01A-11R-A034-07__gene_expression_analysis.txt
unc.edu__AgilentG4502A_07_3__TCGA-BH-A0E9-01B-11R-A115-07__gene_expression_analysis.txt
unc.edu__AgilentG4502A_07_3__TCGA-BH-A0EA-01A-11R-A115-07__gene_expression_analysis.txt
unc.edu__AgilentG4502A_07_3__TCGA-BH-A0EB-01A-11R-A034-07__gene_expression_analysis.txt
unc.edu__AgilentG4502A_07_3__TCGA-BH-A0EE-01A-11R-A034-07__gene_expression_analysis.txt
unc.edu__AgilentG4502A_07_3__TCGA-BH-A0EI-01A-11R-A115-07__gene_expression_analysis.txt
unc.edu__AgilentG4502A_07_3__TCGA-BH-A0GY-01A-11R-A056-07__gene_expression_analysis.txt
unc.edu__AgilentG4502A_07_3__TCGA-BH-A0GZ-01A-11R-A056-07__gene_expression_analysis.txt
unc.edu__AgilentG4502A_07_3__TCGA-BH-A0H0-01A-11R-A056-07__gene_expression_analysis.txt
unc.edu__AgilentG4502A_07_3__TCGA-BH-A0H3-01A-11R-A12P-07__gene_expression_analysis.txt
unc.edu__AgilentG4502A_07_3__TCGA-BH-A0H5-01A-21R-A115-07__gene_expression_analysis.txt
unc.edu__AgilentG4502A_07_3__TCGA-BH-A0H6-01A-21R-A056-07__gene_expression_analysis.txt
unc.edu__AgilentG4502A_07_3__TCGA-BH-A0H7-01A-13R-A056-07__gene_expression_analysis.txt
unc.edu__AgilentG4502A_07_3__TCGA-BH-A0H9-01A-11R-A056-07__gene_expression_analysis.txt
unc.edu__AgilentG4502A_07_3__TCGA-BH-A0HA-01A-11R-A12P-07__gene_expression_analysis.txt
unc.edu__AgilentG4502A_07_3__TCGA-BH-A0HB-01A-11R-A056-07__gene_expression_analysis.txt
unc.edu__AgilentG4502A_07_3__TCGA-BH-A0HF-01A-11R-A056-07__gene_expression_analysis.txt
unc.edu__AgilentG4502A_07_3__TCGA-BH-A0HI-01A-11R-A084-07__gene_expression_analysis.txt
unc.edu__AgilentG4502A_07_3__TCGA-BH-A0HK-01A-11R-A056-07__gene_expression_analysis.txt
unc.edu__AgilentG4502A_07_3__TCGA-BH-A0HO-01A-11R-A034-07__gene_expression_analysis.txt
unc.edu__AgilentG4502A_07_3__TCGA-BH-A0HP-01A-12R-A084-07__gene_expression_analysis.txt
unc.edu__AgilentG4502A_07_3__TCGA-BH-A0HQ-01A-11R-A034-07__gene_expression_analysis.txt
unc.edu__AgilentG4502A_07_3__TCGA-BH-A0HU-01A-11R-A034-07__gene_expression_analysis.txt
unc.edu__AgilentG4502A_07_3__TCGA-BH-A0HW-01A-11R-A034-07__gene_expression_analysis.txt
unc.edu__AgilentG4502A_07_3__TCGA-BH-A0HX-01A-21R-A056-07__gene_expression_analysis.txt
unc.edu__AgilentG4502A_07_3__TCGA-BH-A0HY-01A-11R-A056-07__gene_expression_analysis.txt
unc.edu__AgilentG4502A_07_3__TCGA-BH-A0RX-01A-21R-A084-07__gene_expression_analysis.txt
unc.edu__AgilentG4502A_07_3__TCGA-BH-A0W3-01A-11R-A109-07__gene_expression_analysis.txt
unc.edu__AgilentG4502A_07_3__TCGA-BH-A0W4-01A-11R-A109-07__gene_expression_analysis.txt
unc.edu__AgilentG4502A_07_3__TCGA-BH-A0W5-01A-11R-A109-07__gene_expression_analysis.txt
unc.edu__AgilentG4502A_07_3__TCGA-BH-A0W7-01A-11R-A115-07__gene_expression_analysis.txt
unc.edu__AgilentG4502A_07_3__TCGA-BH-A0WA-01A-11R-A109-07__gene_expression_analysis.txt
unc.edu__AgilentG4502A_07_3__TCGA-BH-A18F-01A-11R-A12D-07__gene_expression_analysis.txt
unc.edu__AgilentG4502A_07_3__TCGA-BH-A18G-01A-11R-A12D-07__gene_expression_analysis.txt
unc.edu__AgilentG4502A_07_3__TCGA-BH-A18H-01A-11R-A12D-07__gene_expression_analysis.txt
unc.edu__AgilentG4502A_07_3__TCGA-BH-A18I-01A-11R-A12D-07__gene_expression_analysis.txt
unc.edu__AgilentG4502A_07_3__TCGA-BH-A18J-01A-11R-A12D-07__gene_expression_analysis.txt
unc.edu__AgilentG4502A_07_3__TCGA-BH-A18K-01A-11R-A12D-07__gene_expression_analysis.txt
unc.edu__AgilentG4502A_07_3__TCGA-BH-A18L-01A-32R-A12D-07__gene_expression_analysis.txt
unc.edu__AgilentG4502A_07_3__TCGA-BH-A18M-01A-11R-A12D-07__gene_expression_analysis.txt
unc.edu__AgilentG4502A_07_3__TCGA-BH-A18N-01A-11R-A12D-07__gene_expression_analysis.txt
unc.edu__AgilentG4502A_07_3__TCGA-BH-A18P-01A-11R-A12D-07__gene_expression_analysis.txt
unc.edu__AgilentG4502A_07_3__TCGA-BH-A18Q-01A-12R-A12D-07__gene_expression_analysis.txt
unc.edu__AgilentG4502A_07_3__TCGA-BH-A18R-01A-11R-A12D-07__gene_expression_analysis.txt
unc.edu__AgilentG4502A_07_3__TCGA-BH-A18S-01A-11R-A12D-07__gene_expression_analysis.txt
unc.edu__AgilentG4502A_07_3__TCGA-BH-A18T-01A-11R-A12D-07__gene_expression_analysis.txt
unc.edu__AgilentG4502A_07_3__TCGA-BH-A18U-01A-21R-A12D-07__gene_expression_analysis.txt
unc.edu__AgilentG4502A_07_3__TCGA-BH-A18V-01A-11R-A12D-07__gene_expression_analysis.txt
unc.edu__AgilentG4502A_07_3__TCGA-BH-A1EO-01A-11R-A137-07__gene_expression_analysis.txt
unc.edu__AgilentG4502A_07_3__TCGA-BH-A1ES-01A-11R-A137-07__gene_expression_analysis.txt
unc.edu__AgilentG4502A_07_3__TCGA-BH-A1ET-01A-11R-A137-07__gene_expression_analysis.txt
unc.edu__AgilentG4502A_07_3__TCGA-BH-A1ET-11B-23R-A137-07__gene_expression_analysis.txt
unc.edu__AgilentG4502A_07_3__TCGA-BH-A1EU-01A-11R-A137-07__gene_expression_analysis.txt
unc.edu__AgilentG4502A_07_3__TCGA-BH-A1EV-01A-11R-A137-07__gene_expression_analysis.txt
unc.edu__AgilentG4502A_07_3__TCGA-BH-A1EW-01A-11R-A137-07__gene_expression_analysis.txt
unc.edu__AgilentG4502A_07_3__TCGA-BH-A1EW-11B-33R-A137-07__gene_expression_analysis.txt
unc.edu__AgilentG4502A_07_3__TCGA-BH-A1F0-01A-11R-A137-07__gene_expression_analysis.txt
unc.edu__AgilentG4502A_07_3__TCGA-BH-A1F0-11B-23R-A137-07__gene_expression_analysis.txt
unc.edu__AgilentG4502A_07_3__TCGA-C8-A12K-01A-21R-A115-07__gene_expression_analysis.txt
unc.edu__AgilentG4502A_07_3__TCGA-C8-A12L-01A-11R-A115-07__gene_expression_analysis.txt
unc.edu__AgilentG4502A_07_3__TCGA-C8-A12M-01A-11R-A115-07__gene_expression_analysis.txt
unc.edu__AgilentG4502A_07_3__TCGA-C8-A12N-01A-11R-A115-07__gene_expression_analysis.txt
unc.edu__AgilentG4502A_07_3__TCGA-C8-A12O-01A-11R-A115-07__gene_expression_analysis.txt
unc.edu__AgilentG4502A_07_3__TCGA-C8-A12P-01A-11R-A115-07__gene_expression_analysis.txt
unc.edu__AgilentG4502A_07_3__TCGA-C8-A12Q-01A-11R-A115-07__gene_expression_analysis.txt
unc.edu__AgilentG4502A_07_3__TCGA-C8-A12T-01A-11R-A115-07__gene_expression_analysis.txt
unc.edu__AgilentG4502A_07_3__TCGA-C8-A12U-01A-11R-A115-07__gene_expression_analysis.txt
unc.edu__AgilentG4502A_07_3__TCGA-C8-A12V-01A-11R-A115-07__gene_expression_analysis.txt
unc.edu__AgilentG4502A_07_3__TCGA-C8-A12W-01A-11R-A115-07__gene_expression_analysis.txt
unc.edu__AgilentG4502A_07_3__TCGA-C8-A12X-01A-11R-A115-07__gene_expression_analysis.txt
unc.edu__AgilentG4502A_07_3__TCGA-C8-A12Y-01A-11R-A12D-07__gene_expression_analysis.txt
unc.edu__AgilentG4502A_07_3__TCGA-C8-A12Z-01A-11R-A115-07__gene_expression_analysis.txt
unc.edu__AgilentG4502A_07_3__TCGA-C8-A130-01A-31R-A115-07__gene_expression_analysis.txt
unc.edu__AgilentG4502A_07_3__TCGA-C8-A131-01A-11R-A115-07__gene_expression_analysis.txt
unc.edu__AgilentG4502A_07_3__TCGA-C8-A132-01A-31R-A115-07__gene_expression_analysis.txt
unc.edu__AgilentG4502A_07_3__TCGA-C8-A133-01A-32R-A12D-07__gene_expression_analysis.txt
unc.edu__AgilentG4502A_07_3__TCGA-C8-A134-01A-11R-A115-07__gene_expression_analysis.txt
unc.edu__AgilentG4502A_07_3__TCGA-C8-A135-01A-11R-A115-07__gene_expression_analysis.txt
unc.edu__AgilentG4502A_07_3__TCGA-C8-A137-01A-11R-A115-07__gene_expression_analysis.txt
unc.edu__AgilentG4502A_07_3__TCGA-C8-A138-01A-11R-A115-07__gene_expression_analysis.txt
unc.edu__AgilentG4502A_07_3__TCGA-C8-A1HF-01A-11R-A137-07__gene_expression_analysis.txt
unc.edu__AgilentG4502A_07_3__TCGA-C8-A1HG-01A-11R-A137-07__gene_expression_analysis.txt
unc.edu__AgilentG4502A_07_3__TCGA-C8-A1HI-01A-11R-A137-07__gene_expression_analysis.txt
unc.edu__AgilentG4502A_07_3__TCGA-C8-A1HL-01A-11R-A137-07__gene_expression_analysis.txt
unc.edu__AgilentG4502A_07_3__TCGA-C8-A1HM-01A-12R-A137-07__gene_expression_analysis.txt
unc.edu__AgilentG4502A_07_3__TCGA-C8-A1HN-01A-11R-A137-07__gene_expression_analysis.txt
unc.edu__AgilentG4502A_07_3__TCGA-D8-A13Y-01A-11R-A115-07__gene_expression_analysis.txt
unc.edu__AgilentG4502A_07_3__TCGA-D8-A13Z-01A-11R-A115-07__gene_expression_analysis.txt
unc.edu__AgilentG4502A_07_3__TCGA-D8-A140-01A-11R-A115-07__gene_expression_analysis.txt
unc.edu__AgilentG4502A_07_3__TCGA-D8-A141-01A-11R-A115-07__gene_expression_analysis.txt
unc.edu__AgilentG4502A_07_3__TCGA-D8-A142-01A-11R-A115-07__gene_expression_analysis.txt
unc.edu__AgilentG4502A_07_3__TCGA-D8-A143-01A-11R-A115-07__gene_expression_analysis.txt
unc.edu__AgilentG4502A_07_3__TCGA-D8-A145-01A-11R-A115-07__gene_expression_analysis.txt
unc.edu__AgilentG4502A_07_3__TCGA-D8-A146-01A-31R-A115-07__gene_expression_analysis.txt
unc.edu__AgilentG4502A_07_3__TCGA-D8-A147-01A-11R-A115-07__gene_expression_analysis.txt
unc.edu__AgilentG4502A_07_3__TCGA-E2-A105-01A-11R-A10J-07__gene_expression_analysis.txt
unc.edu__AgilentG4502A_07_3__TCGA-E2-A106-01A-11R-A10J-07__gene_expression_analysis.txt
unc.edu__AgilentG4502A_07_3__TCGA-E2-A107-01A-11R-A10J-07__gene_expression_analysis.txt
unc.edu__AgilentG4502A_07_3__TCGA-E2-A108-01A-13R-A10J-07__gene_expression_analysis.txt
unc.edu__AgilentG4502A_07_3__TCGA-E2-A109-01A-11R-A10J-07__gene_expression_analysis.txt
unc.edu__AgilentG4502A_07_3__TCGA-E2-A10A-01A-21R-A115-07__gene_expression_analysis.txt
unc.edu__AgilentG4502A_07_3__TCGA-E2-A10B-01A-11R-A10J-07__gene_expression_analysis.txt
unc.edu__AgilentG4502A_07_3__TCGA-E2-A10C-01A-21R-A10J-07__gene_expression_analysis.txt
unc.edu__AgilentG4502A_07_3__TCGA-E2-A10E-01A-21R-A10J-07__gene_expression_analysis.txt
unc.edu__AgilentG4502A_07_3__TCGA-E2-A10F-01A-11R-A10J-07__gene_expression_analysis.txt
unc.edu__AgilentG4502A_07_3__TCGA-E2-A14N-01A-31R-A137-07__gene_expression_analysis.txt
unc.edu__AgilentG4502A_07_3__TCGA-E2-A14O-01A-31R-A115-07__gene_expression_analysis.txt
unc.edu__AgilentG4502A_07_3__TCGA-E2-A14P-01A-31R-A12D-07__gene_expression_analysis.txt
unc.edu__AgilentG4502A_07_3__TCGA-E2-A14Q-01A-11R-A12D-07__gene_expression_analysis.txt
unc.edu__AgilentG4502A_07_3__TCGA-E2-A14R-01A-11R-A115-07__gene_expression_analysis.txt
unc.edu__AgilentG4502A_07_3__TCGA-E2-A14S-01A-11R-A12D-07__gene_expression_analysis.txt
unc.edu__AgilentG4502A_07_3__TCGA-E2-A14T-01A-11R-A115-07__gene_expression_analysis.txt
unc.edu__AgilentG4502A_07_3__TCGA-E2-A14V-01A-11R-A12D-07__gene_expression_analysis.txt
unc.edu__AgilentG4502A_07_3__TCGA-E2-A14W-01A-11R-A12D-07__gene_expression_analysis.txt
unc.edu__AgilentG4502A_07_3__TCGA-E2-A14X-01A-11R-A115-07__gene_expression_analysis.txt
unc.edu__AgilentG4502A_07_3__TCGA-E2-A14Y-01A-21R-A12D-07__gene_expression_analysis.txt
unc.edu__AgilentG4502A_07_3__TCGA-E2-A14Z-01A-11R-A115-07__gene_expression_analysis.txt
unc.edu__AgilentG4502A_07_3__TCGA-E2-A150-01A-11R-A12D-07__gene_expression_analysis.txt
unc.edu__AgilentG4502A_07_3__TCGA-E2-A152-01A-11R-A12D-07__gene_expression_analysis.txt
unc.edu__AgilentG4502A_07_3__TCGA-E2-A153-01A-12R-A12D-07__gene_expression_analysis.txt
unc.edu__AgilentG4502A_07_3__TCGA-E2-A154-01A-11R-A115-07__gene_expression_analysis.txt
unc.edu__AgilentG4502A_07_3__TCGA-E2-A155-01A-11R-A12D-07__gene_expression_analysis.txt
unc.edu__AgilentG4502A_07_3__TCGA-E2-A156-01A-11R-A12D-07__gene_expression_analysis.txt
unc.edu__AgilentG4502A_07_3__TCGA-E2-A158-01A-11R-A12D-07__gene_expression_analysis.txt
unc.edu__AgilentG4502A_07_3__TCGA-E2-A159-01A-11R-A115-07__gene_expression_analysis.txt
unc.edu__AgilentG4502A_07_3__TCGA-E2-A15A-01A-11R-A12D-07__gene_expression_analysis.txt
unc.edu__AgilentG4502A_07_3__TCGA-E2-A15C-01A-31R-A12D-07__gene_expression_analysis.txt
unc.edu__AgilentG4502A_07_3__TCGA-E2-A15D-01A-11R-A115-07__gene_expression_analysis.txt
unc.edu__AgilentG4502A_07_3__TCGA-E2-A15E-01A-11R-A12D-07__gene_expression_analysis.txt
unc.edu__AgilentG4502A_07_3__TCGA-E2-A15F-01A-11R-A115-07__gene_expression_analysis.txt
unc.edu__AgilentG4502A_07_3__TCGA-E2-A15G-01A-11R-A12D-07__gene_expression_analysis.txt
unc.edu__AgilentG4502A_07_3__TCGA-E2-A15H-01A-11R-A12D-07__gene_expression_analysis.txt
unc.edu__AgilentG4502A_07_3__TCGA-E2-A15I-01A-21R-A137-07__gene_expression_analysis.txt
unc.edu__AgilentG4502A_07_3__TCGA-E2-A15J-01A-11R-A12P-07__gene_expression_analysis.txt
unc.edu__AgilentG4502A_07_3__TCGA-E2-A15K-01A-11R-A12P-07__gene_expression_analysis.txt
unc.edu__AgilentG4502A_07_3__TCGA-E2-A15L-01A-11R-A12D-07__gene_expression_analysis.txt
unc.edu__AgilentG4502A_07_3__TCGA-E2-A15M-01A-11R-A12D-07__gene_expression_analysis.txt
unc.edu__AgilentG4502A_07_3__TCGA-E2-A15O-01A-11R-A115-07__gene_expression_analysis.txt
unc.edu__AgilentG4502A_07_3__TCGA-E2-A15P-01A-11R-A115-07__gene_expression_analysis.txt
unc.edu__AgilentG4502A_07_3__TCGA-E2-A15R-01A-11R-A115-07__gene_expression_analysis.txt
unc.edu__AgilentG4502A_07_3__TCGA-E2-A15S-01A-11R-A115-07__gene_expression_analysis.txt
unc.edu__AgilentG4502A_07_3__TCGA-E2-A15T-01A-11R-A115-07__gene_expression_analysis.txt
unc.edu__AgilentG4502A_07_3__TCGA-E2-A1AZ-01A-11R-A12P-07__gene_expression_analysis.txt
unc.edu__AgilentG4502A_07_3__TCGA-E2-A1B0-01A-11R-A12P-07__gene_expression_analysis.txt
unc.edu__AgilentG4502A_07_3__TCGA-E2-A1B1-01A-21R-A12P-07__gene_expression_analysis.txt
unc.edu__AgilentG4502A_07_3__TCGA-E2-A1B4-01A-11R-A12P-07__gene_expression_analysis.txt
unc.edu__AgilentG4502A_07_3__TCGA-E2-A1B5-01A-21R-A12P-07__gene_expression_analysis.txt
unc.edu__AgilentG4502A_07_3__TCGA-E2-A1B6-01A-31R-A12P-07__gene_expression_analysis.txt
unc.edu__AgilentG4502A_07_3__TCGA-E2-A1BC-01A-11R-A12P-07__gene_expression_analysis.txt
unc.edu__AgilentG4502A_07_3__TCGA-E2-A1BD-01A-11R-A12P-07__gene_expression_analysis.txt

## Sheet: TCGA_BRCA_NORM
unc.edu__AgilentG4502A_07_3__TCGA-A7-A0CE-11A-21R-A089-07__gene_expression_analysis.txt
unc.edu__AgilentG4502A_07_3__TCGA-A7-A0CH-11A-32R-A089-07__gene_expression_analysis.txt
unc.edu__AgilentG4502A_07_3__TCGA-A7-A0D9-11A-53R-A089-07__gene_expression_analysis.txt
unc.edu__AgilentG4502A_07_3__TCGA-A7-A0DB-11A-33R-A089-07__gene_expression_analysis.txt
unc.edu__AgilentG4502A_07_3__TCGA-A7-A0DC-11A-41R-A089-07__gene_expression_analysis.txt
unc.edu__AgilentG4502A_07_3__TCGA-A7-A13E-11A-61R-A12P-07__gene_expression_analysis.txt
unc.edu__AgilentG4502A_07_3__TCGA-A7-A13F-11A-42R-A12P-07__gene_expression_analysis.txt
unc.edu__AgilentG4502A_07_3__TCGA-BH-A0AU-11A-11R-A12P-07__gene_expression_analysis.txt
unc.edu__AgilentG4502A_07_3__TCGA-BH-A0AY-11A-23R-A089-07__gene_expression_analysis.txt
unc.edu__AgilentG4502A_07_3__TCGA-BH-A0B5-11A-23R-A12P-07__gene_expression_analysis.txt
unc.edu__AgilentG4502A_07_3__TCGA-BH-A0B7-11A-34R-A115-07__gene_expression_analysis.txt
unc.edu__AgilentG4502A_07_3__TCGA-BH-A0B8-11A-41R-A089-07__gene_expression_analysis.txt
unc.edu__AgilentG4502A_07_3__TCGA-BH-A0BA-11A-22R-A089-07__gene_expression_analysis.txt
unc.edu__AgilentG4502A_07_3__TCGA-BH-A0BC-11A-22R-A089-07__gene_expression_analysis.txt
unc.edu__AgilentG4502A_07_3__TCGA-BH-A0BJ-11A-23R-A089-07__gene_expression_analysis.txt
unc.edu__AgilentG4502A_07_3__TCGA-BH-A0BM-11A-12R-A089-07__gene_expression_analysis.txt
unc.edu__AgilentG4502A_07_3__TCGA-BH-A0BQ-11A-33R-A115-07__gene_expression_analysis.txt
unc.edu__AgilentG4502A_07_3__TCGA-BH-A0BS-11A-11R-A12P-07__gene_expression_analysis.txt
unc.edu__AgilentG4502A_07_3__TCGA-BH-A0BV-11A-31R-A089-07__gene_expression_analysis.txt
unc.edu__AgilentG4502A_07_3__TCGA-BH-A0BW-11A-12R-A115-07__gene_expression_analysis.txt
unc.edu__AgilentG4502A_07_3__TCGA-BH-A0BZ-11A-61R-A12P-07__gene_expression_analysis.txt
unc.edu__AgilentG4502A_07_3__TCGA-BH-A0C0-11A-21R-A089-07__gene_expression_analysis.txt
unc.edu__AgilentG4502A_07_3__TCGA-BH-A0C3-11A-23R-A12P-07__gene_expression_analysis.txt
unc.edu__AgilentG4502A_07_3__TCGA-BH-A0DD-11A-23R-A12P-07__gene_expression_analysis.txt
unc.edu__AgilentG4502A_07_3__TCGA-BH-A0DH-11A-31R-A089-07__gene_expression_analysis.txt
unc.edu__AgilentG4502A_07_3__TCGA-BH-A0DK-11A-13R-A089-07__gene_expression_analysis.txt
unc.edu__AgilentG4502A_07_3__TCGA-BH-A0DL-11A-13R-A115-07__gene_expression_analysis.txt
unc.edu__AgilentG4502A_07_3__TCGA-BH-A0DO-11A-22R-A12D-07__gene_expression_analysis.txt
unc.edu__AgilentG4502A_07_3__TCGA-BH-A0DP-11A-12R-A089-07__gene_expression_analysis.txt
unc.edu__AgilentG4502A_07_3__TCGA-BH-A0DQ-11A-12R-A089-07__gene_expression_analysis.txt
unc.edu__AgilentG4502A_07_3__TCGA-BH-A0DT-11A-12R-A12D-07__gene_expression_analysis.txt
unc.edu__AgilentG4502A_07_3__TCGA-BH-A0DV-11A-22R-A12P-07__gene_expression_analysis.txt
unc.edu__AgilentG4502A_07_3__TCGA-BH-A0DZ-11A-22R-A089-07__gene_expression_analysis.txt
unc.edu__AgilentG4502A_07_3__TCGA-BH-A0E0-11A-13R-A089-07__gene_expression_analysis.txt
unc.edu__AgilentG4502A_07_3__TCGA-BH-A0E1-11A-13R-A089-07__gene_expression_analysis.txt
unc.edu__AgilentG4502A_07_3__TCGA-BH-A0H5-11A-62R-A115-07__gene_expression_analysis.txt
unc.edu__AgilentG4502A_07_3__TCGA-BH-A0H7-11A-13R-A089-07__gene_expression_analysis.txt
unc.edu__AgilentG4502A_07_3__TCGA-BH-A0H9-11A-22R-A089-07__gene_expression_analysis.txt
unc.edu__AgilentG4502A_07_3__TCGA-BH-A0HA-11A-31R-A12P-07__gene_expression_analysis.txt
unc.edu__AgilentG4502A_07_3__TCGA-BH-A0HK-11A-11R-A089-07__gene_expression_analysis.txt
unc.edu__AgilentG4502A_07_3__TCGA-BH-A18J-11A-31R-A12D-07__gene_expression_analysis.txt
unc.edu__AgilentG4502A_07_3__TCGA-BH-A18K-11A-13R-A12D-07__gene_expression_analysis.txt
unc.edu__AgilentG4502A_07_3__TCGA-BH-A18L-11A-42R-A12D-07__gene_expression_analysis.txt
unc.edu__AgilentG4502A_07_3__TCGA-BH-A18M-11A-33R-A12D-07__gene_expression_analysis.txt
unc.edu__AgilentG4502A_07_3__TCGA-BH-A18N-11A-43R-A12D-07__gene_expression_analysis.txt
unc.edu__AgilentG4502A_07_3__TCGA-BH-A18P-11A-43R-A12D-07__gene_expression_analysis.txt
unc.edu__AgilentG4502A_07_3__TCGA-BH-A18Q-11A-34R-A12D-07__gene_expression_analysis.txt
unc.edu__AgilentG4502A_07_3__TCGA-BH-A18R-11A-42R-A12D-07__gene_expression_analysis.txt
unc.edu__AgilentG4502A_07_3__TCGA-BH-A18S-11A-43R-A12D-07__gene_expression_analysis.txt
unc.edu__AgilentG4502A_07_3__TCGA-BH-A18U-11A-23R-A12D-07__gene_expression_analysis.txt
unc.edu__AgilentG4502A_07_3__TCGA-BH-A18V-11A-52R-A12D-07__gene_expression_analysis.txt
unc.edu__AgilentG4502A_07_3__TCGA-BH-A1EO-11A-31R-A137-07__gene_expression_analysis.txt
unc.edu__AgilentG4502A_07_3__TCGA-BH-A1EU-11A-23R-A137-07__gene_expression_analysis.txt
unc.edu__AgilentG4502A_07_3__TCGA-E2-A153-11A-31R-A12D-07__gene_expression_analysis.txt
unc.edu__AgilentG4502A_07_3__TCGA-E2-A158-11A-22R-A12D-07__gene_expression_analysis.txt
unc.edu__AgilentG4502A_07_3__TCGA-E2-A15I-11A-32R-A137-07__gene_expression_analysis.txt
unc.edu__AgilentG4502A_07_3__TCGA-E2-A15M-11A-22R-A12D-07__gene_expression_analysis.txt
unc.edu__AgilentG4502A_07_3__TCGA-E2-A1BC-11A-32R-A12P-07__gene_expression_analysis.txt

## Sheet: TCGA_COAD_TUMOR
unc.edu__AgilentG4502A_07_3__TCGA-A6-2670-01A-02R-0821-07__gene_expression_analysis.txt
unc.edu__AgilentG4502A_07_3__TCGA-A6-2672-01A-01R-0826-07__gene_expression_analysis.txt
unc.edu__AgilentG4502A_07_3__TCGA-A6-2674-01A-02R-0821-07__gene_expression_analysis.txt
unc.edu__AgilentG4502A_07_3__TCGA-A6-2676-01A-01R-0826-07__gene_expression_analysis.txt
unc.edu__AgilentG4502A_07_3__TCGA-A6-2677-01A-01R-0821-07__gene_expression_analysis.txt
unc.edu__AgilentG4502A_07_3__TCGA-A6-2678-01A-01R-0821-07__gene_expression_analysis.txt
unc.edu__AgilentG4502A_07_3__TCGA-A6-2683-01A-01R-0821-07__gene_expression_analysis.txt
unc.edu__AgilentG4502A_07_3__TCGA-A6-3807-01A-01R-1022-07__gene_expression_analysis.txt
unc.edu__AgilentG4502A_07_3__TCGA-A6-3808-01A-01R-1022-07__gene_expression_analysis.txt
unc.edu__AgilentG4502A_07_3__TCGA-A6-3809-01A-01R-1022-07__gene_expression_analysis.txt
unc.edu__AgilentG4502A_07_3__TCGA-A6-3810-01A-01R-1022-07__gene_expression_analysis.txt
unc.edu__AgilentG4502A_07_3__TCGA-AA-3514-01A-02R-0821-07__gene_expression_analysis.txt
unc.edu__AgilentG4502A_07_3__TCGA-AA-3516-01A-02R-0826-07__gene_expression_analysis.txt
unc.edu__AgilentG4502A_07_3__TCGA-AA-3517-01A-01R-0821-07__gene_expression_analysis.txt
unc.edu__AgilentG4502A_07_3__TCGA-AA-3518-01A-02R-0826-07__gene_expression_analysis.txt
unc.edu__AgilentG4502A_07_3__TCGA-AA-3519-01A-02R-0821-07__gene_expression_analysis.txt
unc.edu__AgilentG4502A_07_3__TCGA-AA-3520-01A-01R-0821-07__gene_expression_analysis.txt
unc.edu__AgilentG4502A_07_3__TCGA-AA-3521-01A-01R-0821-07__gene_expression_analysis.txt
unc.edu__AgilentG4502A_07_3__TCGA-AA-3522-01A-01R-0821-07__gene_expression_analysis.txt
unc.edu__AgilentG4502A_07_3__TCGA-AA-3524-01A-02R-0821-07__gene_expression_analysis.txt
unc.edu__AgilentG4502A_07_3__TCGA-AA-3525-01A-02R-0826-07__gene_expression_analysis.txt
unc.edu__AgilentG4502A_07_3__TCGA-AA-3526-01A-02R-0821-07__gene_expression_analysis.txt
unc.edu__AgilentG4502A_07_3__TCGA-AA-3527-01A-01R-0821-07__gene_expression_analysis.txt
unc.edu__AgilentG4502A_07_3__TCGA-AA-3529-01A-02R-0821-07__gene_expression_analysis.txt
unc.edu__AgilentG4502A_07_3__TCGA-AA-3530-01A-01R-1022-07__gene_expression_analysis.txt
unc.edu__AgilentG4502A_07_3__TCGA-AA-3531-01A-01R-0821-07__gene_expression_analysis.txt
unc.edu__AgilentG4502A_07_3__TCGA-AA-3532-01A-01R-0821-07__gene_expression_analysis.txt
unc.edu__AgilentG4502A_07_3__TCGA-AA-3534-01A-01R-0821-07__gene_expression_analysis.txt
unc.edu__AgilentG4502A_07_3__TCGA-AA-3538-01A-01R-0821-07__gene_expression_analysis.txt
unc.edu__AgilentG4502A_07_3__TCGA-AA-3542-01A-02R-0821-07__gene_expression_analysis.txt
unc.edu__AgilentG4502A_07_3__TCGA-AA-3543-01A-01R-0826-07__gene_expression_analysis.txt
unc.edu__AgilentG4502A_07_3__TCGA-AA-3544-01A-01R-0821-07__gene_expression_analysis.txt
unc.edu__AgilentG4502A_07_3__TCGA-AA-3548-01A-01R-0821-07__gene_expression_analysis.txt
unc.edu__AgilentG4502A_07_3__TCGA-AA-3549-01A-02R-0821-07__gene_expression_analysis.txt
unc.edu__AgilentG4502A_07_3__TCGA-AA-3552-01A-01R-0821-07__gene_expression_analysis.txt
unc.edu__AgilentG4502A_07_3__TCGA-AA-3553-01A-01R-0821-07__gene_expression_analysis.txt
unc.edu__AgilentG4502A_07_3__TCGA-AA-3554-01A-01R-0826-07__gene_expression_analysis.txt
unc.edu__AgilentG4502A_07_3__TCGA-AA-3555-01A-01R-0821-07__gene_expression_analysis.txt
unc.edu__AgilentG4502A_07_3__TCGA-AA-3556-01A-01R-0821-07__gene_expression_analysis.txt
unc.edu__AgilentG4502A_07_3__TCGA-AA-3558-01A-01R-0821-07__gene_expression_analysis.txt
unc.edu__AgilentG4502A_07_3__TCGA-AA-3560-01A-01R-0821-07__gene_expression_analysis.txt
unc.edu__AgilentG4502A_07_3__TCGA-AA-3561-01A-01R-0821-07__gene_expression_analysis.txt
unc.edu__AgilentG4502A_07_3__TCGA-AA-3562-01A-02R-0821-07__gene_expression_analysis.txt
unc.edu__AgilentG4502A_07_3__TCGA-AA-3664-01A-01R-0905-07__gene_expression_analysis.txt
unc.edu__AgilentG4502A_07_3__TCGA-AA-3666-01A-02R-0905-07__gene_expression_analysis.txt
unc.edu__AgilentG4502A_07_3__TCGA-AA-3667-01A-01R-0905-07__gene_expression_analysis.txt
unc.edu__AgilentG4502A_07_3__TCGA-AA-3672-01A-01R-0905-07__gene_expression_analysis.txt
unc.edu__AgilentG4502A_07_3__TCGA-AA-3673-01A-01R-0905-07__gene_expression_analysis.txt
unc.edu__AgilentG4502A_07_3__TCGA-AA-3675-01A-02R-0905-07__gene_expression_analysis.txt
unc.edu__AgilentG4502A_07_3__TCGA-AA-3678-01A-01R-0905-07__gene_expression_analysis.txt
unc.edu__AgilentG4502A_07_3__TCGA-AA-3679-01A-02R-0905-07__gene_expression_analysis.txt
unc.edu__AgilentG4502A_07_3__TCGA-AA-3680-01A-01R-0905-07__gene_expression_analysis.txt
unc.edu__AgilentG4502A_07_3__TCGA-AA-3681-01A-01R-0905-07__gene_expression_analysis.txt
unc.edu__AgilentG4502A_07_3__TCGA-AA-3684-01A-02R-0905-07__gene_expression_analysis.txt
unc.edu__AgilentG4502A_07_3__TCGA-AA-3685-01A-02R-0905-07__gene_expression_analysis.txt
unc.edu__AgilentG4502A_07_3__TCGA-AA-3688-01A-01R-0905-07__gene_expression_analysis.txt
unc.edu__AgilentG4502A_07_3__TCGA-AA-3692-01A-01R-0905-07__gene_expression_analysis.txt
unc.edu__AgilentG4502A_07_3__TCGA-AA-3693-01A-01R-0905-07__gene_expression_analysis.txt
unc.edu__AgilentG4502A_07_3__TCGA-AA-3695-01A-01R-0905-07__gene_expression_analysis.txt
unc.edu__AgilentG4502A_07_3__TCGA-AA-3696-01A-01R-0905-07__gene_expression_analysis.txt
unc.edu__AgilentG4502A_07_3__TCGA-AA-3710-01A-01R-1022-07__gene_expression_analysis.txt
unc.edu__AgilentG4502A_07_3__TCGA-AA-3715-01A-01R-0905-07__gene_expression_analysis.txt
unc.edu__AgilentG4502A_07_3__TCGA-AA-3811-01A-01R-1022-07__gene_expression_analysis.txt
unc.edu__AgilentG4502A_07_3__TCGA-AA-3812-01A-01R-0905-07__gene_expression_analysis.txt
unc.edu__AgilentG4502A_07_3__TCGA-AA-3814-01A-01R-0905-07__gene_expression_analysis.txt
unc.edu__AgilentG4502A_07_3__TCGA-AA-3815-01A-01R-1022-07__gene_expression_analysis.txt
unc.edu__AgilentG4502A_07_3__TCGA-AA-3818-01A-01R-0905-07__gene_expression_analysis.txt
unc.edu__AgilentG4502A_07_3__TCGA-AA-3819-01A-01R-0905-07__gene_expression_analysis.txt
unc.edu__AgilentG4502A_07_3__TCGA-AA-3821-01A-01R-1022-07__gene_expression_analysis.txt
unc.edu__AgilentG4502A_07_3__TCGA-AA-3831-01A-01R-0905-07__gene_expression_analysis.txt
unc.edu__AgilentG4502A_07_3__TCGA-AA-3833-01A-01R-0905-07__gene_expression_analysis.txt
unc.edu__AgilentG4502A_07_3__TCGA-AA-3837-01A-01R-0905-07__gene_expression_analysis.txt
unc.edu__AgilentG4502A_07_3__TCGA-AA-3841-01A-01R-0905-07__gene_expression_analysis.txt
unc.edu__AgilentG4502A_07_3__TCGA-AA-3842-01A-01R-1022-07__gene_expression_analysis.txt
unc.edu__AgilentG4502A_07_3__TCGA-AA-3844-01A-01R-1022-07__gene_expression_analysis.txt
unc.edu__AgilentG4502A_07_3__TCGA-AA-3845-01A-01R-1022-07__gene_expression_analysis.txt
unc.edu__AgilentG4502A_07_3__TCGA-AA-3846-01A-01R-1022-07__gene_expression_analysis.txt
unc.edu__AgilentG4502A_07_3__TCGA-AA-3848-01A-01R-0905-07__gene_expression_analysis.txt
unc.edu__AgilentG4502A_07_3__TCGA-AA-3850-01A-01R-1022-07__gene_expression_analysis.txt
unc.edu__AgilentG4502A_07_3__TCGA-AA-3851-01A-01R-1022-07__gene_expression_analysis.txt
unc.edu__AgilentG4502A_07_3__TCGA-AA-3852-01A-01R-0905-07__gene_expression_analysis.txt
unc.edu__AgilentG4502A_07_3__TCGA-AA-3854-01A-01R-0905-07__gene_expression_analysis.txt
unc.edu__AgilentG4502A_07_3__TCGA-AA-3855-01A-01R-1022-07__gene_expression_analysis.txt
unc.edu__AgilentG4502A_07_3__TCGA-AA-3856-01A-01R-0905-07__gene_expression_analysis.txt
unc.edu__AgilentG4502A_07_3__TCGA-AA-3858-01A-01R-0905-07__gene_expression_analysis.txt
unc.edu__AgilentG4502A_07_3__TCGA-AA-3860-01A-02R-0905-07__gene_expression_analysis.txt
unc.edu__AgilentG4502A_07_3__TCGA-AA-3861-01A-01R-1022-07__gene_expression_analysis.txt
unc.edu__AgilentG4502A_07_3__TCGA-AA-3862-01A-01R-1022-07__gene_expression_analysis.txt
unc.edu__AgilentG4502A_07_3__TCGA-AA-3864-01A-01R-1022-07__gene_expression_analysis.txt
unc.edu__AgilentG4502A_07_3__TCGA-AA-3866-01A-01R-1022-07__gene_expression_analysis.txt
unc.edu__AgilentG4502A_07_3__TCGA-AA-3867-01A-01R-1022-07__gene_expression_analysis.txt
unc.edu__AgilentG4502A_07_3__TCGA-AA-3869-01A-01R-1022-07__gene_expression_analysis.txt
unc.edu__AgilentG4502A_07_3__TCGA-AA-3870-01A-01R-1022-07__gene_expression_analysis.txt
unc.edu__AgilentG4502A_07_3__TCGA-AA-3872-01A-01R-1022-07__gene_expression_analysis.txt
unc.edu__AgilentG4502A_07_3__TCGA-AA-3875-01A-01R-0905-07__gene_expression_analysis.txt
unc.edu__AgilentG4502A_07_3__TCGA-AA-3877-01A-01R-1022-07__gene_expression_analysis.txt
unc.edu__AgilentG4502A_07_3__TCGA-AA-3930-01A-01R-1022-07__gene_expression_analysis.txt
unc.edu__AgilentG4502A_07_3__TCGA-AA-3939-01A-01R-1022-07__gene_expression_analysis.txt
unc.edu__AgilentG4502A_07_3__TCGA-AA-3941-01A-01R-1022-07__gene_expression_analysis.txt
unc.edu__AgilentG4502A_07_3__TCGA-AA-3947-01A-01R-1022-07__gene_expression_analysis.txt
unc.edu__AgilentG4502A_07_3__TCGA-AA-3949-01A-01R-1022-07__gene_expression_analysis.txt
unc.edu__AgilentG4502A_07_3__TCGA-AA-3950-01A-02R-1022-07__gene_expression_analysis.txt
unc.edu__AgilentG4502A_07_3__TCGA-AA-3952-01A-01R-1022-07__gene_expression_analysis.txt
unc.edu__AgilentG4502A_07_3__TCGA-AA-3955-01A-02R-1022-07__gene_expression_analysis.txt
unc.edu__AgilentG4502A_07_3__TCGA-AA-3956-01A-02R-1022-07__gene_expression_analysis.txt
unc.edu__AgilentG4502A_07_3__TCGA-AA-3966-01A-01R-1113-07__gene_expression_analysis.txt
unc.edu__AgilentG4502A_07_3__TCGA-AA-3968-01A-01R-1022-07__gene_expression_analysis.txt
unc.edu__AgilentG4502A_07_3__TCGA-AA-3970-01A-01R-1022-07__gene_expression_analysis.txt
unc.edu__AgilentG4502A_07_3__TCGA-AA-3971-01A-01R-1022-07__gene_expression_analysis.txt
unc.edu__AgilentG4502A_07_3__TCGA-AA-3972-01A-01R-1022-07__gene_expression_analysis.txt
unc.edu__AgilentG4502A_07_3__TCGA-AA-3973-01A-01R-1022-07__gene_expression_analysis.txt
unc.edu__AgilentG4502A_07_3__TCGA-AA-3975-01A-01R-1022-07__gene_expression_analysis.txt
unc.edu__AgilentG4502A_07_3__TCGA-AA-3976-01A-01R-1022-07__gene_expression_analysis.txt
unc.edu__AgilentG4502A_07_3__TCGA-AA-3977-01A-01R-1022-07__gene_expression_analysis.txt
unc.edu__AgilentG4502A_07_3__TCGA-AA-3979-01A-01R-1022-07__gene_expression_analysis.txt
unc.edu__AgilentG4502A_07_3__TCGA-AA-3980-01A-02R-1022-07__gene_expression_analysis.txt
unc.edu__AgilentG4502A_07_3__TCGA-AA-3982-01A-02R-1022-07__gene_expression_analysis.txt
unc.edu__AgilentG4502A_07_3__TCGA-AA-3984-01A-02R-1022-07__gene_expression_analysis.txt
unc.edu__AgilentG4502A_07_3__TCGA-AA-3986-01A-02R-1022-07__gene_expression_analysis.txt
unc.edu__AgilentG4502A_07_3__TCGA-AA-3989-01A-01R-1022-07__gene_expression_analysis.txt
unc.edu__AgilentG4502A_07_3__TCGA-AA-3994-01A-01R-1113-07__gene_expression_analysis.txt
unc.edu__AgilentG4502A_07_3__TCGA-AA-A004-01A-01R-A00A-07__gene_expression_analysis.txt
unc.edu__AgilentG4502A_07_3__TCGA-AA-A00A-01A-01R-A002-07__gene_expression_analysis.txt
unc.edu__AgilentG4502A_07_3__TCGA-AA-A00D-01A-01R-A002-07__gene_expression_analysis.txt
unc.edu__AgilentG4502A_07_3__TCGA-AA-A00E-01A-01R-A002-07__gene_expression_analysis.txt
unc.edu__AgilentG4502A_07_3__TCGA-AA-A00F-01A-01R-A002-07__gene_expression_analysis.txt
unc.edu__AgilentG4502A_07_3__TCGA-AA-A00J-01A-02R-A002-07__gene_expression_analysis.txt
unc.edu__AgilentG4502A_07_3__TCGA-AA-A00K-01A-02R-A002-07__gene_expression_analysis.txt
unc.edu__AgilentG4502A_07_3__TCGA-AA-A00L-01A-01R-A002-07__gene_expression_analysis.txt
unc.edu__AgilentG4502A_07_3__TCGA-AA-A00N-01A-02R-A00A-07__gene_expression_analysis.txt
unc.edu__AgilentG4502A_07_3__TCGA-AA-A00O-01A-02R-A00A-07__gene_expression_analysis.txt
unc.edu__AgilentG4502A_07_3__TCGA-AA-A00Q-01A-01R-A002-07__gene_expression_analysis.txt
unc.edu__AgilentG4502A_07_3__TCGA-AA-A00R-01A-01R-A002-07__gene_expression_analysis.txt
unc.edu__AgilentG4502A_07_3__TCGA-AA-A00U-01A-01R-A002-07__gene_expression_analysis.txt
unc.edu__AgilentG4502A_07_3__TCGA-AA-A00W-01A-01R-A002-07__gene_expression_analysis.txt
unc.edu__AgilentG4502A_07_3__TCGA-AA-A00Z-01A-01R-A002-07__gene_expression_analysis.txt
unc.edu__AgilentG4502A_07_3__TCGA-AA-A010-01A-01R-A00A-07__gene_expression_analysis.txt
unc.edu__AgilentG4502A_07_3__TCGA-AA-A017-01A-01R-A00A-07__gene_expression_analysis.txt
unc.edu__AgilentG4502A_07_3__TCGA-AA-A01C-01A-01R-A00A-07__gene_expression_analysis.txt
unc.edu__AgilentG4502A_07_3__TCGA-AA-A01D-01A-01R-A00A-07__gene_expression_analysis.txt
unc.edu__AgilentG4502A_07_3__TCGA-AA-A01F-01A-01R-A002-07__gene_expression_analysis.txt
unc.edu__AgilentG4502A_07_3__TCGA-AA-A01G-01A-01R-A002-07__gene_expression_analysis.txt
unc.edu__AgilentG4502A_07_3__TCGA-AA-A01I-01A-02R-A00A-07__gene_expression_analysis.txt
unc.edu__AgilentG4502A_07_3__TCGA-AA-A01K-01A-01R-A00A-07__gene_expression_analysis.txt
unc.edu__AgilentG4502A_07_3__TCGA-AA-A01Q-01A-01R-A002-07__gene_expression_analysis.txt
unc.edu__AgilentG4502A_07_3__TCGA-AA-A024-01A-02R-A00A-07__gene_expression_analysis.txt
unc.edu__AgilentG4502A_07_3__TCGA-AA-A029-01A-01R-A00A-07__gene_expression_analysis.txt
unc.edu__AgilentG4502A_07_3__TCGA-AA-A02E-01A-01R-A00A-07__gene_expression_analysis.txt
unc.edu__AgilentG4502A_07_3__TCGA-AA-A02F-01A-01R-A00A-07__gene_expression_analysis.txt
unc.edu__AgilentG4502A_07_3__TCGA-AA-A02H-01A-01R-A00A-07__gene_expression_analysis.txt
unc.edu__AgilentG4502A_07_3__TCGA-AA-A02J-01A-01R-A00A-07__gene_expression_analysis.txt
unc.edu__AgilentG4502A_07_3__TCGA-AA-A02R-01A-01R-A00A-07__gene_expression_analysis.txt
unc.edu__AgilentG4502A_07_3__TCGA-AA-A02W-01A-01R-A00A-07__gene_expression_analysis.txt
unc.edu__AgilentG4502A_07_3__TCGA-AY-4070-01A-01R-1113-07__gene_expression_analysis.txt
unc.edu__AgilentG4502A_07_3__TCGA-AY-4071-01A-01R-1113-07__gene_expression_analysis.txt

## Sheet: TCGA_COAD_NOM
unc.edu__AgilentG4502A_07_3__TCGA-A6-2671-11A-01R-1758-07__gene_expression_analysis.txt
unc.edu__AgilentG4502A_07_3__TCGA-A6-2676-11A-01R-1758-07__gene_expression_analysis.txt
unc.edu__AgilentG4502A_07_3__TCGA-A6-2678-11A-01R-1758-07__gene_expression_analysis.txt
unc.edu__AgilentG4502A_07_3__TCGA-A6-2679-11A-01R-1758-07__gene_expression_analysis.txt
unc.edu__AgilentG4502A_07_3__TCGA-A6-2680-11A-01R-1758-07__gene_expression_analysis.txt
unc.edu__AgilentG4502A_07_3__TCGA-A6-2682-11A-01R-1758-07__gene_expression_analysis.txt
unc.edu__AgilentG4502A_07_3__TCGA-A6-2683-11A-01R-1758-07__gene_expression_analysis.txt
unc.edu__AgilentG4502A_07_3__TCGA-A6-2684-11A-01R-1758-07__gene_expression_analysis.txt
unc.edu__AgilentG4502A_07_3__TCGA-A6-2685-11A-01R-1758-07__gene_expression_analysis.txt
unc.edu__AgilentG4502A_07_3__TCGA-A6-2686-11A-01R-1758-07__gene_expression_analysis.txt
unc.edu__AgilentG4502A_07_3__TCGA-AA-3514-11A-01R-1758-07__gene_expression_analysis.txt
unc.edu__AgilentG4502A_07_3__TCGA-AA-3517-11A-01R-1758-07__gene_expression_analysis.txt
unc.edu__AgilentG4502A_07_3__TCGA-AA-3518-11A-01R-1758-07__gene_expression_analysis.txt
unc.edu__AgilentG4502A_07_3__TCGA-AA-3520-11A-01R-1758-07__gene_expression_analysis.txt
unc.edu__AgilentG4502A_07_3__TCGA-AA-3522-11A-01R-1758-07__gene_expression_analysis.txt
unc.edu__AgilentG4502A_07_3__TCGA-AA-3525-11A-01R-1758-07__gene_expression_analysis.txt
unc.edu__AgilentG4502A_07_3__TCGA-AA-3527-11A-01R-1758-07__gene_expression_analysis.txt
unc.edu__AgilentG4502A_07_3__TCGA-AA-3531-11A-01R-1758-07__gene_expression_analysis.txt
unc.edu__AgilentG4502A_07_3__TCGA-AA-3534-11A-01R-1758-07__gene_expression_analysis.txt

## Sheet: TCGA_GBM_TUMOR
unc.edu__AgilentG4502A_07_2__TCGA-02-0087-01A-01R-0282-07__gene_expression_analysis.txt
unc.edu__AgilentG4502A_07_2__TCGA-02-0106-01A-01R-0282-07__gene_expression_analysis.txt
unc.edu__AgilentG4502A_07_2__TCGA-02-0111-01A-01R-0282-07__gene_expression_analysis.txt
unc.edu__AgilentG4502A_07_2__TCGA-02-0258-01A-01R-0282-07__gene_expression_analysis.txt
unc.edu__AgilentG4502A_07_2__TCGA-02-0260-01A-03R-0282-07__gene_expression_analysis.txt
unc.edu__AgilentG4502A_07_2__TCGA-02-0266-01A-01R-0282-07__gene_expression_analysis.txt
unc.edu__AgilentG4502A_07_2__TCGA-02-0269-01B-01R-0282-07__gene_expression_analysis.txt
unc.edu__AgilentG4502A_07_2__TCGA-02-0271-01A-01R-0282-07__gene_expression_analysis.txt
unc.edu__AgilentG4502A_07_2__TCGA-02-0281-01A-01R-0282-07__gene_expression_analysis.txt
unc.edu__AgilentG4502A_07_2__TCGA-02-0285-01A-01R-0282-07__gene_expression_analysis.txt
unc.edu__AgilentG4502A_07_2__TCGA-02-0289-01A-01R-0282-07__gene_expression_analysis.txt
unc.edu__AgilentG4502A_07_2__TCGA-02-0290-01A-01R-0282-07__gene_expression_analysis.txt
unc.edu__AgilentG4502A_07_2__TCGA-02-0317-01A-01R-0282-07__gene_expression_analysis.txt
unc.edu__AgilentG4502A_07_2__TCGA-02-0321-01A-01R-0282-07__gene_expression_analysis.txt
unc.edu__AgilentG4502A_07_2__TCGA-02-0324-01A-01R-0282-07__gene_expression_analysis.txt
unc.edu__AgilentG4502A_07_2__TCGA-02-0325-01A-01R-0282-07__gene_expression_analysis.txt
unc.edu__AgilentG4502A_07_2__TCGA-02-0326-01A-01R-0282-07__gene_expression_analysis.txt
unc.edu__AgilentG4502A_07_2__TCGA-02-0330-01A-01R-0282-07__gene_expression_analysis.txt
unc.edu__AgilentG4502A_07_2__TCGA-02-0332-01A-01R-0282-07__gene_expression_analysis.txt
unc.edu__AgilentG4502A_07_2__TCGA-02-0333-01A-02R-0282-07__gene_expression_analysis.txt
unc.edu__AgilentG4502A_07_2__TCGA-02-0337-01A-01R-0282-07__gene_expression_analysis.txt
unc.edu__AgilentG4502A_07_2__TCGA-02-0338-01A-01R-0282-07__gene_expression_analysis.txt
unc.edu__AgilentG4502A_07_2__TCGA-02-0339-01A-01R-0282-07__gene_expression_analysis.txt
unc.edu__AgilentG4502A_07_2__TCGA-02-0422-01A-01R-0282-07__gene_expression_analysis.txt
unc.edu__AgilentG4502A_07_2__TCGA-02-0430-01A-01R-0282-07__gene_expression_analysis.txt
unc.edu__AgilentG4502A_07_2__TCGA-02-0432-01A-02R-0282-07__gene_expression_analysis.txt
unc.edu__AgilentG4502A_07_2__TCGA-02-0439-01A-01R-0282-07__gene_expression_analysis.txt
unc.edu__AgilentG4502A_07_2__TCGA-02-0440-01A-01R-0282-07__gene_expression_analysis.txt
unc.edu__AgilentG4502A_07_2__TCGA-02-0446-01A-01R-0282-07__gene_expression_analysis.txt
unc.edu__AgilentG4502A_07_2__TCGA-02-0451-01A-01R-0282-07__gene_expression_analysis.txt
unc.edu__AgilentG4502A_07_2__TCGA-02-0456-01A-01R-0282-07__gene_expression_analysis.txt
unc.edu__AgilentG4502A_07_2__TCGA-06-0146-01A-01R-0282-07__gene_expression_analysis.txt
unc.edu__AgilentG4502A_07_2__TCGA-06-0149-01A-05R-0282-07__gene_expression_analysis.txt
unc.edu__AgilentG4502A_07_2__TCGA-06-0162-01A-01R-0282-07__gene_expression_analysis.txt
unc.edu__AgilentG4502A_07_2__TCGA-06-0164-01A-01R-0282-07__gene_expression_analysis.txt
unc.edu__AgilentG4502A_07_2__TCGA-06-0175-01A-01R-0282-07__gene_expression_analysis.txt
unc.edu__AgilentG4502A_07_2__TCGA-06-0177-01A-01R-0282-07__gene_expression_analysis.txt
unc.edu__AgilentG4502A_07_2__TCGA-06-0179-01A-02R-0282-07__gene_expression_analysis.txt
unc.edu__AgilentG4502A_07_2__TCGA-06-0182-01A-01R-0282-07__gene_expression_analysis.txt
unc.edu__AgilentG4502A_07_2__TCGA-06-0194-01A-01R-0282-07__gene_expression_analysis.txt
unc.edu__AgilentG4502A_07_2__TCGA-06-0394-01A-01R-0282-07__gene_expression_analysis.txt
unc.edu__AgilentG4502A_07_2__TCGA-06-0397-01A-01R-0282-07__gene_expression_analysis.txt
unc.edu__AgilentG4502A_07_2__TCGA-06-0402-01A-01R-0282-07__gene_expression_analysis.txt
unc.edu__AgilentG4502A_07_2__TCGA-06-0409-01A-02R-0282-07__gene_expression_analysis.txt
unc.edu__AgilentG4502A_07_2__TCGA-06-0410-01A-01R-0282-07__gene_expression_analysis.txt
unc.edu__AgilentG4502A_07_2__TCGA-06-0412-01A-01R-0282-07__gene_expression_analysis.txt
unc.edu__AgilentG4502A_07_2__TCGA-06-0413-01A-01R-0282-07__gene_expression_analysis.txt
unc.edu__AgilentG4502A_07_2__TCGA-06-0414-01A-01R-0282-07__gene_expression_analysis.txt
unc.edu__AgilentG4502A_07_2__TCGA-08-0509-01A-01R-0282-07__gene_expression_analysis.txt
unc.edu__AgilentG4502A_07_2__TCGA-08-0510-01A-01R-0282-07__gene_expression_analysis.txt
unc.edu__AgilentG4502A_07_2__TCGA-08-0511-01A-01R-0282-07__gene_expression_analysis.txt
unc.edu__AgilentG4502A_07_2__TCGA-08-0512-01A-01R-0282-07__gene_expression_analysis.txt
unc.edu__AgilentG4502A_07_2__TCGA-08-0514-01A-01R-0282-07__gene_expression_analysis.txt
unc.edu__AgilentG4502A_07_2__TCGA-08-0516-01A-01R-0282-07__gene_expression_analysis.txt
unc.edu__AgilentG4502A_07_2__TCGA-08-0517-01A-01R-0282-07__gene_expression_analysis.txt
unc.edu__AgilentG4502A_07_2__TCGA-08-0518-01A-01R-0282-07__gene_expression_analysis.txt
unc.edu__AgilentG4502A_07_2__TCGA-08-0520-01A-01R-0282-07__gene_expression_analysis.txt
unc.edu__AgilentG4502A_07_2__TCGA-08-0521-01A-01R-0282-07__gene_expression_analysis.txt
unc.edu__AgilentG4502A_07_2__TCGA-08-0522-01A-01R-0282-07__gene_expression_analysis.txt
unc.edu__AgilentG4502A_07_2__TCGA-08-0524-01A-01R-0282-07__gene_expression_analysis.txt
unc.edu__AgilentG4502A_07_2__TCGA-08-0525-01A-01R-0282-07__gene_expression_analysis.txt
unc.edu__AgilentG4502A_07_2__TCGA-08-0529-01A-02R-0282-07__gene_expression_analysis.txt
unc.edu__AgilentG4502A_07_2__TCGA-08-0531-01A-01R-0282-07__gene_expression_analysis.txt

## Sheet: TCGA_GBM_NORM
unc.edu__AgilentG4502A_07_2__TCGA-06-0673-11A-01R-0344-07__gene_expression_analysis.txt
unc.edu__AgilentG4502A_07_2__TCGA-06-0675-11A-01R-0344-07__gene_expression_analysis.txt
unc.edu__AgilentG4502A_07_2__TCGA-06-0676-11A-02R-0344-07__gene_expression_analysis.txt
unc.edu__AgilentG4502A_07_2__TCGA-06-0678-11A-01R-0344-07__gene_expression_analysis.txt
unc.edu__AgilentG4502A_07_2__TCGA-06-0680-11A-01R-0344-07__gene_expression_analysis.txt
unc.edu__AgilentG4502A_07_2__TCGA-06-0681-11A-01R-0344-07__gene_expression_analysis.txt
unc.edu__AgilentG4502A_07_2__TCGA-08-0623-11A-01R-0344-07__gene_expression_analysis.txt
unc.edu__AgilentG4502A_07_2__TCGA-08-0625-11A-01R-0344-07__gene_expression_analysis.txt
unc.edu__AgilentG4502A_07_2__TCGA-08-0626-11A-01R-0344-07__gene_expression_analysis.txt
unc.edu__AgilentG4502A_07_2__TCGA-08-0627-11A-01R-0344-07__gene_expression_analysis.txt
